# Supplementary material
Source: Royal Society of Chemistry journal article supplement (doi:10.1039/d6cp00728g)
Supplement: d6cp00728g1.pdf [file d6cp00728g1.pdf]

## Supporting Information

### Substituent Modulated Adaptive Aromaticity in NHC-Pyrrolyl Cations: A Combined DFT and Machine Learning Study

Sohail H. Dar, Jun Zhu\*

Guangdong Basic Research Center of Excellence for Aggregate Science, School of Science and Engineering, The Chinese University of Hong Kong (Shenzhen), Longgang, Shenzhen, Guangdong, 518172, P.R. China

Correspondence and requests for materials should be addressed to J. Z. (email: [jun.zhu@cuhk.edu.cn](mailto:jun.zhu@cuhk.edu.cn); ORCID: 0000-0002-2099-3156).

## Table of Contents

|                                                                                                           |         |
|-----------------------------------------------------------------------------------------------------------|---------|
| 1. Aromaticity indices for the studied systems -----                                                      | S2      |
| 2. EDDB analysis-----                                                                                     | S3      |
| 3. Geometrical parameters -----                                                                           | S3      |
| 4. Correlation diagrams-----                                                                              | S4-S5   |
| 5. AICD Plots of model systems-----                                                                       | S5-S6   |
| 6. Frontier MOs -----                                                                                     | S6      |
| 7. Regression Analysis-----                                                                               | S7-S10  |
| 8. PCA Analysis -----                                                                                     | S10-S11 |
| 9. Comparative T <sub>1</sub> aromaticity indices at M06-2X and CAM-B3LYP (def2-TZVPP)-----               | S12     |
| 10. Comparison of TD-DFT vertical and UDFT adiabatic singlet–triplet gaps for A–P-----                    | S13     |
| 11. Comparison of the optimized T <sub>1</sub> triplet state geometries of adaptive aromatic systems----- | S13     |
| 12. Optimized coordinates of the studied systems-----                                                     | S14-S42 |
| 13. Reference-----                                                                                        | S43     |

## 1. Aromaticity Indices of the studied systems:

**Table S1.** Overview of aromaticity indices (HOMA, NICS(1)<sub>zz</sub>, EDDB<sub>π</sub> and MCI for the studied systems, based on structures optimized at the M06-2X/def2-TZVPP level of theory

| Compound (Substitution) | Charge | NICS(1) <sub>zz</sub> |                | HOMA           |                | EDDB <sub>π</sub> |                | MCI            |                |
|-------------------------|--------|-----------------------|----------------|----------------|----------------|-------------------|----------------|----------------|----------------|
|                         |        | S <sub>0</sub>        | T <sub>1</sub> | S <sub>0</sub> | T <sub>1</sub> | S <sub>0</sub>    | T <sub>1</sub> | S <sub>0</sub> | T <sub>1</sub> |
| A(NO)                   | -1     | -18.52                | -22.91         | 0.731          | 0.892          | 2.30              | 3.71           | 0.541          | 0.558          |
| B(NO <sub>2</sub> )     | -1     | -22.03                | 10.77          | 0.852          | 0.381          | 3.01              | 2.28           | 0.560          | 0.466          |
| C(CHO)                  | -1     | -19.95                | 14.88          | 0.810          | 0.261          | 3.09              | 2.18           | 0.562          | 0.434          |
| D(COCH <sub>3</sub> )   | -1     | -17.82                | 17.32          | 0.514          | 0.186          | 3.33              | 2.07           | 0.567          | 0.418          |
| E (OH)                  | -1     | -27.19                | -7.30          | 0.947          | 0.465          | 4.619             | 2.276          | 0.587          | 0.511          |
| F(NH <sub>2</sub> )     | -1     | -27.87                | -7.05          | 0.947          | 0.649          | 4.712             | 2.425          | 0.598          | 0.531          |
| G(COOH)                 | -1     | -24.46                | 18.91          | 0.832          | 0.108          | 3.052             | 1.573          | 0.569          | 0.378          |
| H(CN)                   | -1     | -27.40                | 17.71          | 0.885          | -0.269         | 3.745             | 1.357          | 0.578          | 0.240          |
| I(NO)                   | +1     | -24.81                | -24.30         | 0.939          | 0.924          | 3.83              | 3.67           | 0.559          | 0.473          |
| J(NO <sub>2</sub> )     | +1     | -26.25                | -25.83         | 0.959          | 0.950          | 4.24              | 4.15           | 0.557          | 0.559          |
| K(CHO)                  | +1     | -27.12                | -23.03         | 0.941          | 0.865          | 4.11              | 3.44           | 0.554          | 0.527          |
| L(COCH <sub>3</sub> )   | +1     | -27.11                | -23.91         | 0.941          | 0.867          | 4.18              | 3.61           | 0.549          | 0.526          |
| M(OH)                   | +1     | -25.52                | 19.72          | 0.918          | 0.277          | 3.573             | 1.102          | 0.557          | 0.434          |
| N(NH <sub>2</sub> )     | +1     | -26.22                | 12.11          | 0.916          | 0.399          | 3.669             | 0.935          | 0.559          | 0.426          |
| O(COOH)                 | +1     | -27.43                | 21.0           | 0.945          | 0.174          | 3.908             | 1.112          | 0.556          | 0.435          |
| P(CN)                   | +1     | -28.70                | 17.70          | 0.943          | 0.139          | 3.963             | 1.178          | 0.563          | 0.445          |

**Table S2.** Overview of aromaticity indices (HOMA, NICS(1)<sub>zz</sub>, EDDB<sub>π</sub> and MCI for the redox systems I-VI, based on structures optimized at the M06-2X/def2-TZVPP level of theory.

| Compound | Charge | NICS(1) <sub>zz</sub> |                | HOMA           |                | EDDB <sub>π</sub> |                |
|----------|--------|-----------------------|----------------|----------------|----------------|-------------------|----------------|
|          |        | S <sub>0</sub>        | T <sub>1</sub> | S <sub>0</sub> | T <sub>1</sub> | S <sub>0</sub>    | T <sub>1</sub> |
| I        | +1     | 35.77                 | -21.63         | -0.947         | 0.709          | 1.54              | 3.02           |
| II       | -1     | -30.00                | 13.42          | 0.936          | -0.203         | 5.13              | 2.10           |
| III      | +3     | -16.54                | 4.23           | 0.393          | -1.21          | 2.51              | 1.17           |
| IV       | +11    | -29.63                | 17.14          | 0.931          | 0.013          | 4.24              | 1.53           |
| V        | -1     | -1.29                 | -21.85         | 0.293          | 0.926          | 1.58              | 2.66           |
| VI       | +3     | 16.57                 | -7.03          | -0.276         | 0.746          | 1.32              | 2.03           |

## 1. EDDB Analysis:

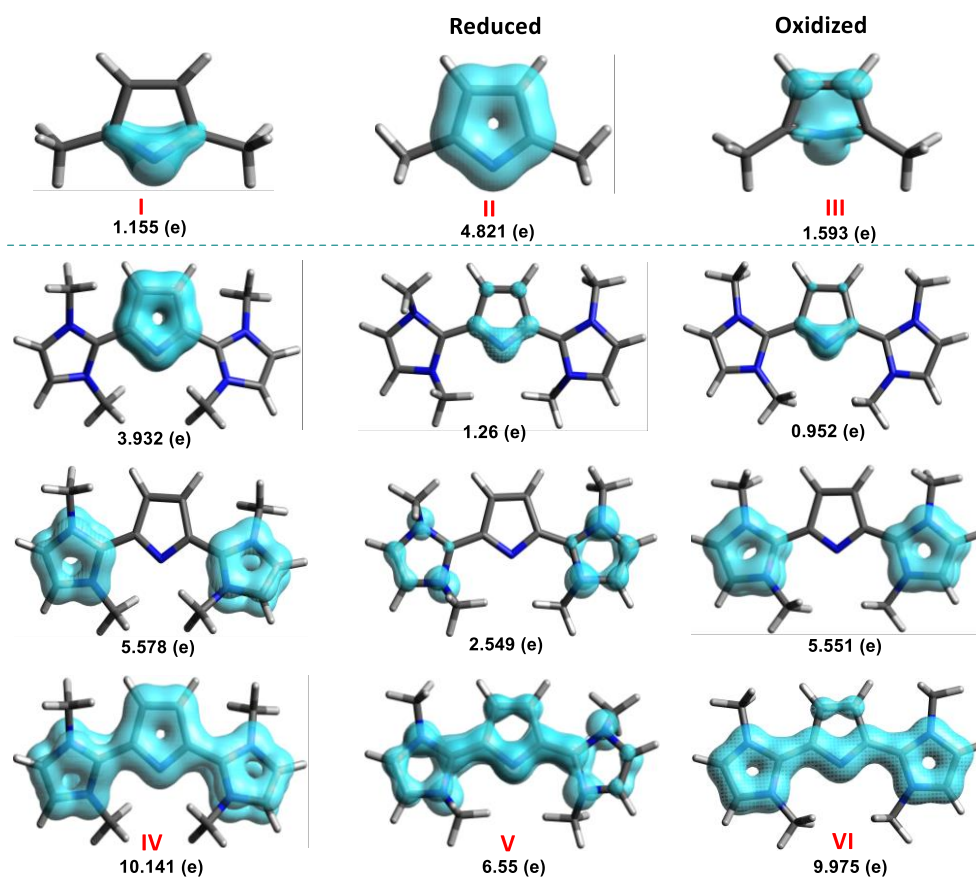

**Figure S1.** EDDB analysis of the compounds I and IV along with their oxidized and reduced species on  $\pi$ -EDDB<sub>5MR</sub> for their singlet states and (isovalue = 0.01 a.u.)

## 3. Geometrical parameters:

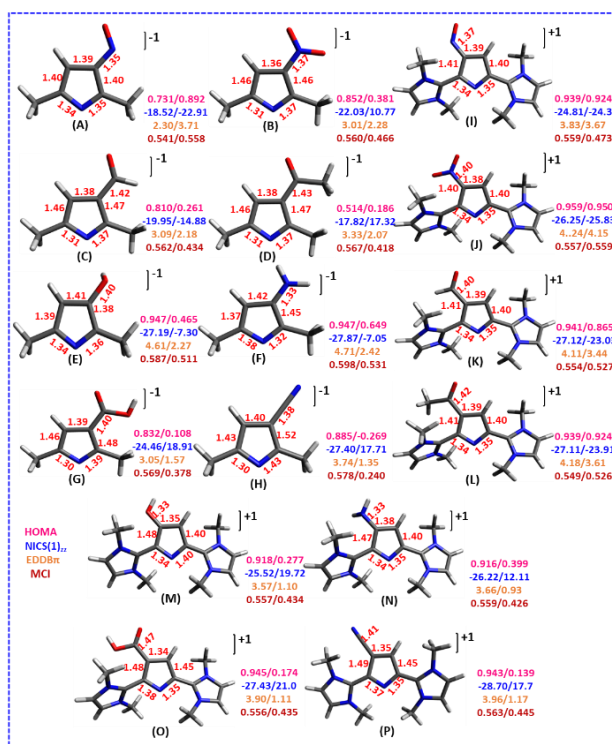

**Figure S2.** Geometrical parameters of interest of compounds A-P in the  $T_1$  state.

#### 4. Correlation Diagrams:

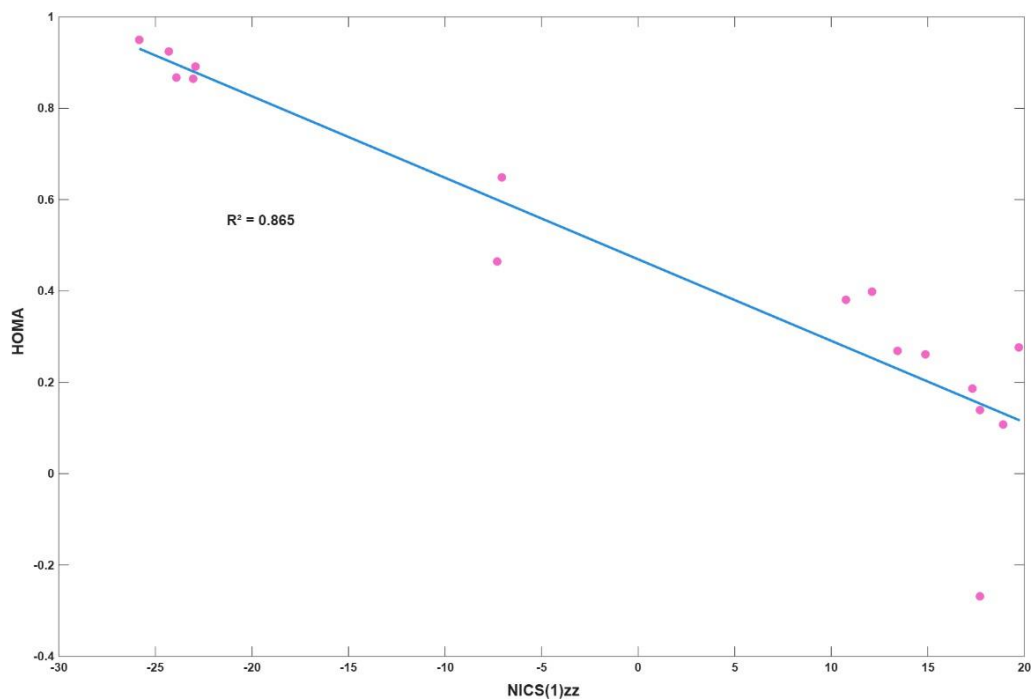

**Figure S3.** Correlation between HOMA and NICS(1)<sub>zz</sub> for compounds A-P.

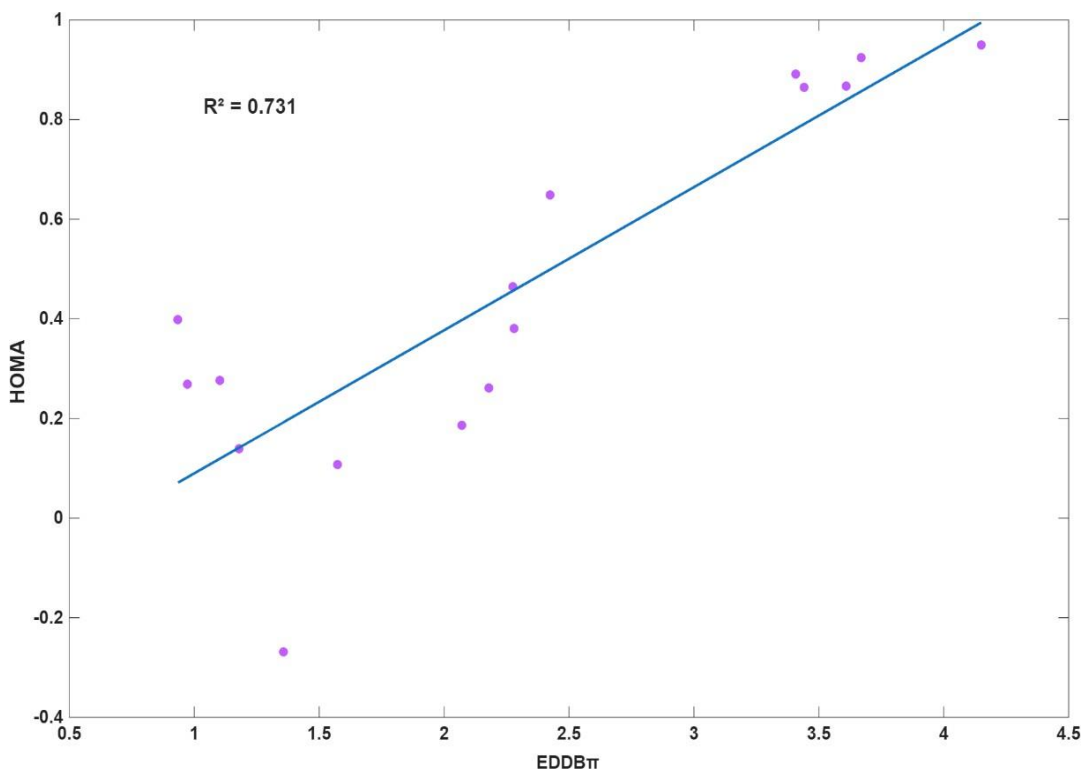

**Figure S4.** Correlation between HOMA and EDDB $\pi$  for compounds A-P.

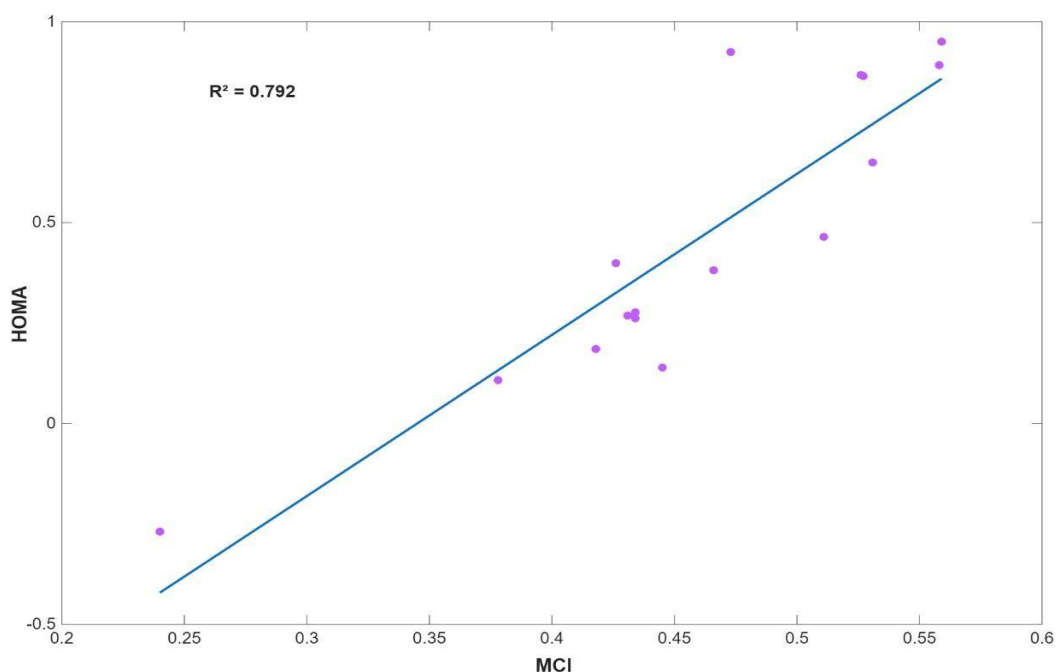

**Figure S5.** Correlation between HOMA and MCI for compounds A-P.

The correlation investigation between different aromatic indexes is shown above. There is a strong correlation seen among different aromaticity indexes with HOMA values plotted along Y axis vs NICS(1)<sub>zz</sub>, EDDB<sub>π</sub>. And MCI along the X axis. The R<sup>2</sup> values for the correlations between HOMA and NICS(1)<sub>zz</sub> are the highest (0.865), followed by HOMA/MCI (0.792) and (0.731) with HOMA/ EDDB<sub>π</sub>, respectively. These values corroborate the data well, as both the HOMA and NICS(1)<sub>zz</sub> prove to be the significant indicators for deciphering the (anti)aromaticity in all the studied systems.

### 5. Acid Plots of the model systems:

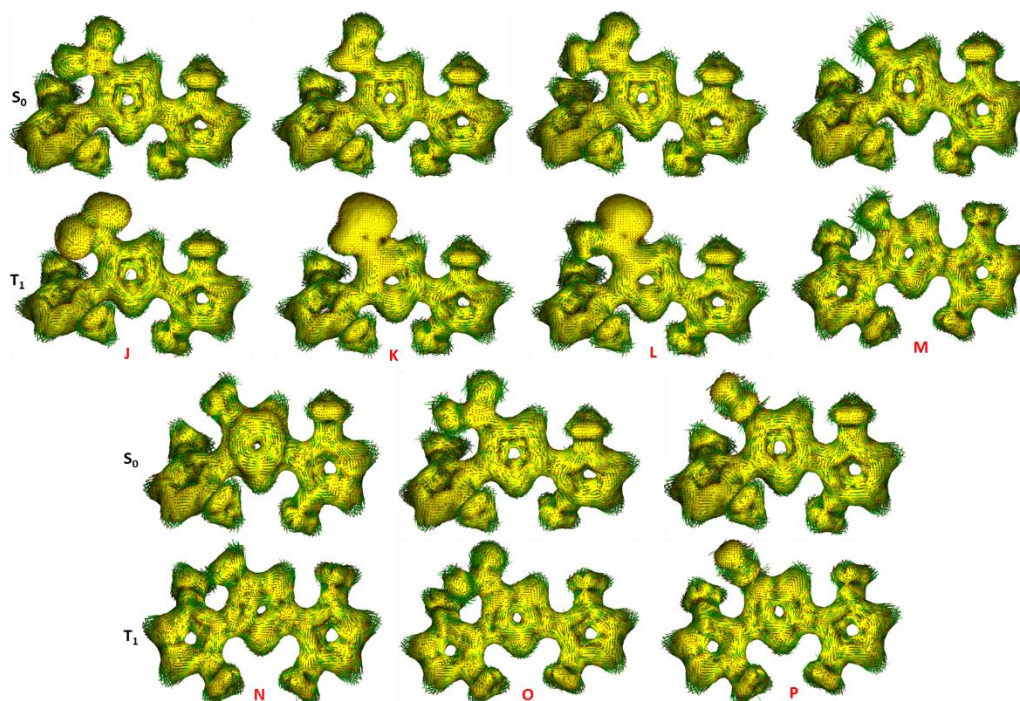

**Figure S6.** ACID plots showing induced current densities in the S<sub>0</sub> and T<sub>1</sub> states for the NHC substituted pyrrolyl cation bearing different substituent groups. Clockwise loops denote aromaticity and counterclockwise denote antiaromaticity.

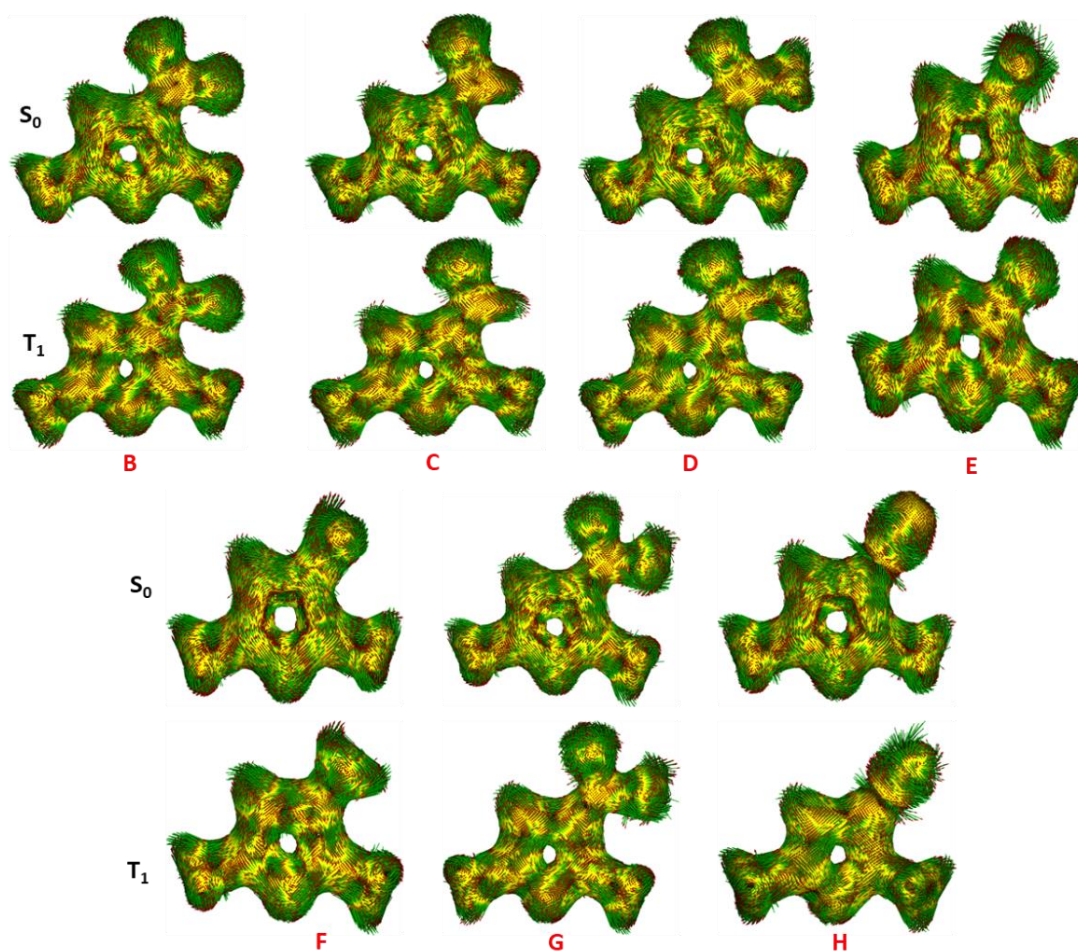

**Figure S7.** ACID plots showing induced current densities in the  $S_0$  and  $T_1$  states for the substituted pyrrolyl anion. Clockwise loops denote aromaticity and counterclockwise denote antiaromaticity.

## 6. Frontier MOs

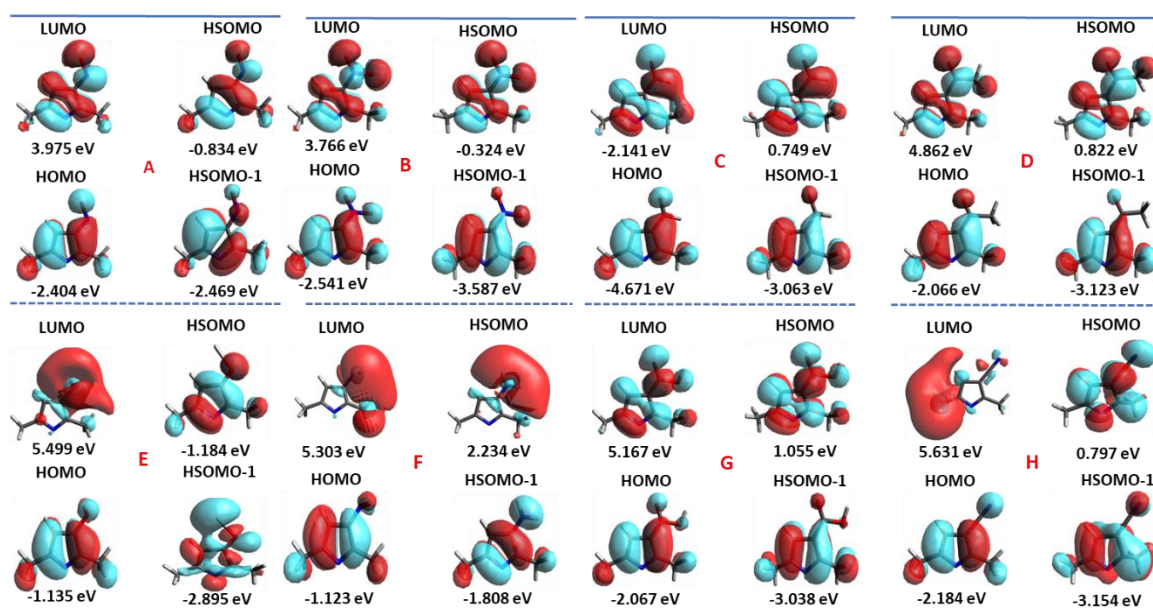

**Figure S8.** Frontier molecular orbitals (MOs) of the substituted pyrrolyl anion

## 7. Linear regression analysis

=== FULL MODEL (Linear + Quadratic Terms) === NICS(1)<sub>zz</sub> as the T<sub>1</sub> state (dependent variable, y);

X<sub>1</sub>-X<sub>4</sub> = Dependent variables; X<sub>5</sub>-X<sub>8</sub> their squared terms

X<sub>1</sub> = (H-L gap); X<sub>2</sub> = (Spin density R); X<sub>3</sub> = (Spin 5MR); X<sub>4</sub> = (ΔFBO)

Linear regression model:

$$y \sim 1 + X_1 + X_2 + X_3 + X_4 + X_5 + X_6 + X_7 + X_8$$

**Table S3:** Coefficients and Significance Levels for the full Regression Model

| Term        | Estimate | SE     | tStat    | pValue   |
|-------------|----------|--------|----------|----------|
| (Intercept) | -817.32  | 436.5  | -1.8725  | 0.1033   |
| X1          | 262.84   | 131.79 | 1.9943   | 0.086341 |
| X2          | -15.498  | 13.392 | -1.1572  | 0.28515  |
| X3          | -13.652  | 62.7   | -0.21774 | 0.83385  |
| X4          | -135.45  | 408.57 | -0.33152 | 0.74996  |
| X5          | -20.285  | 10     | -2.0285  | 0.082097 |
| X6          | -2.8234  | 12.171 | -0.23198 | 0.82319  |
| X7          | 14.627   | 31.126 | 0.46995  | 0.65268  |
| X8          | 218.24   | 544    | 0.40117  | 0.70026  |

Performance Statistics:

| RMSE | R <sup>2</sup> | Adjusted R <sup>2</sup> | F-statistic | p-Value  |
|------|----------------|-------------------------|-------------|----------|
| 4.5  | 0.975          | 0.945                   | 33.5        | 6.63e-05 |

=== LINEAR MODEL (Only Linear Terms) ===

Linear regression model:

$$y \sim 1 + X_1 + X_2 + X_3 + X_4$$

$$Y = \beta_0 + \beta_1 X_1 + \dots + \beta_4 X_4$$

**Table S4:** Coefficients and Significance Levels for the linear Regression Model

| Term         | Estimate | SE     | tStat    | pValue     |
|--------------|----------|--------|----------|------------|
| (Intercept)  | 21.761   | 26.292 | 0.82767  | 0.42545    |
| X1(H-L)      | -3.09    | 3.8089 | -0.81127 | 0.43442    |
| X2(Spin R)   | -18.88   | 3.728  | -5.0643  | 0.00036383 |
| X3(Spin 5MR) | 9.4895   | 7.3235 | 1.2958   | 0.22159    |
| X4(ΔFBO)     | 19.918   | 28.005 | 0.71122  | 0.49175    |

Performance Statistics:

| RMSE | R <sup>2</sup> | Adjusted R <sup>2</sup> | F-statistic | p-Value  |
|------|----------------|-------------------------|-------------|----------|
| 4.6  | 0.958          | 0.943                   | 63.1        | 1.62e-07 |

### Non-Linear Regression Model (Symbolic regression)

$$y \sim b_1 + b_2 * x_1 + b_3 * x_2^2 + b_4 * \text{sqrt}(x_3) + b_5 * \log(x_4)$$

$$y = \alpha_0 + \alpha_1 x_1 + \beta x_2^2 + \alpha_2 * \text{sqrt}(x_3) + \alpha_3 \log(x_4)$$

**Table S5:** Estimated Coefficients and Significance Levels for the Non-linear Regression Model

| m  | Estimate | SE (Std. Error) | tStat  | pValue  |
|----|----------|-----------------|--------|---------|
| b1 | -0.6515  | 24.683          | -0.026 | 0.979   |
| b2 | 4.0187   | 3.9543          | 1.016  | 0.331   |
| b3 | -14.295  | 2.991           | -4.780 | 0.00057 |
| b4 | -6.2251  | 14.308          | -0.435 | 0.672   |
| b5 | 2.8917   | 11.399          | 0.254  | 0.804   |

b3 corresponds to the spin density of the substituent and is highly significant

Performance Statistics:

| RMSE        | R <sup>2</sup> | Adjusted R <sup>2</sup> | F-statistic | p-Value  |
|-------------|----------------|-------------------------|-------------|----------|
| <b>4.89</b> | 0.953          | 0.936                   | 55.6        | 3.15e-07 |

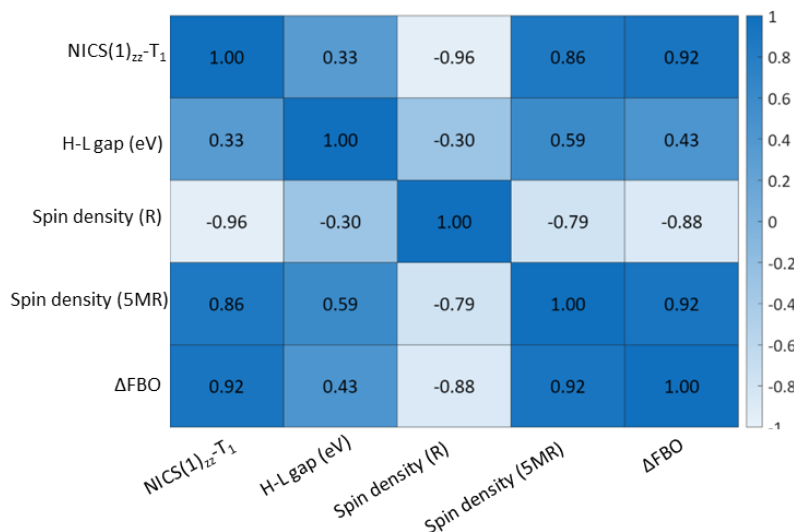

**Figure S9:** Heat map of excited state aromaticity predictors. Absolute value of Pearson correlation is displayed where strong colors indicate strong correlation. magnitudes. Preliminary processing of the data was performed using MATLAB (R2025a) software package.

Examination of the above heat map reveals that NICS(1)<sub>zz</sub> exhibits a strong negative correlation with the spin density of the substituent (-0.96), a strong positive correlation with the fuzzy bond order (ΔFBO) index (0.92), and a moderate correlation with the HOMO–LUMO gap (0.33). The correlation results highlight that the spin density on the substituent (R) emerges as the decisive factor influencing T<sub>1</sub> aromaticity, as evidenced by its strong inverse correlation with NICS(1)<sub>zz</sub>, with greater spin localization corresponding to enhanced aromatic character in the ring system.

**7.1 === FULL MODEL (Linear + Quadratic Terms) === EDDB<sub>π</sub> as the T<sub>1</sub> state (dependent variable, y)**

Linear regression model:  
 $y \sim 1 + X_1 + X_2 + X_3 + X_4 + X_5 + X_6 + X_7 + X_8$   
 $X_1$ - $X_4$  = Dependent variables;  $X_5$ - $X_8$  their squared terms  
 $X_1$  = (H-L gap);  $X_2$  = (Spin density R);  $X_3$  = (Spin 5MR);  $X_4$  = ( $\Delta$ FBO)

**Table S6:** Estimated Coefficients and Significance Levels for the Linear Regression Model

| Term        | Estimate | SE      | tStat   | pValue  |
|-------------|----------|---------|---------|---------|
| (Intercept) | -35.741  | 22.936  | -1.5583 | 0.16313 |
| X1          | 10.665   | 6.9253  | 1.5400  | 0.16745 |
| X2          | 1.4924   | 0.70372 | 2.1207  | 0.07164 |
| X3          | -3.0629  | 3.2947  | -0.9297 | 0.38348 |
| X4          | 11.298   | 21.469  | 0.5263  | 0.61497 |
| X5          | -0.76646 | 0.52548 | -1.4586 | 0.18804 |
| X6          | -0.3597  | 0.63953 | -0.5624 | 0.59136 |
| X7          | 1.965    | 1.6355  | 1.2015  | 0.26864 |
| X8          | -19.026  | 28.585  | -0.6656 | 0.52699 |

Performance Statistics:

| RMSE         | R <sup>2</sup> | Adjusted R <sup>2</sup> | F-statistic | p-Value  |
|--------------|----------------|-------------------------|-------------|----------|
| <b>0.236</b> | 0.977          | 0.951                   | 37.2        | 4.68e-05 |

**=== LINEAR MODEL (Only Linear Terms) ===**

Linear regression model:  
 $y \sim 1 + x_1 + x_2 + x_3 + x_4$   
 $Y = \beta_0 + \beta_1 X_1 + \dots + \beta_4 X_4$

**Table S7:** Estimated Coefficients and Significance Levels for the linear Regression Model

| Term              | Estimate( $\beta$ ) | SE      | tStat  | pValue    |
|-------------------|---------------------|---------|--------|-----------|
| (Intercept)       | 1.3128              | 1.2746  | 1.03   | 0.32514   |
| x1(H-L)           | 0.14112             | 0.18465 | 0.7642 | 0.46081   |
| x2 (Spin R)       | 1.2196              | 0.18073 | 6.748  | 0.0000316 |
| x3 (Spin 5MR)     | 0.57221             | 0.35504 | 1.6117 | 0.13533   |
| x4( $\Delta$ FBO) | -3.5285             | 1.3577  | -2.599 | 0.02474   |

Performance Statistics:

| RMSE         | R <sup>2</sup> | Adjusted R <sup>2</sup> | F-statistic | p-Value   |
|--------------|----------------|-------------------------|-------------|-----------|
| <b>0.223</b> | 0.968          | 0.956                   | 82.9        | 3.87 e-08 |

Substituent spin density (R) is the decisive factor influencing T<sub>1</sub> aromaticity, with a pValue of 0.0000316

### Non-Linear Regression Model (Symbolic regression)

$$y \sim b_1 + b_2 * HL\_Gap\_eV + b_3 * (SpinDensity\_Subst^2) + b_4 * \sqrt{SpinDensity\_5MR} + b_5 * \log(\Delta FBO)$$

$$y \sim b_1 + b_2 * X_1 + b_3 * X_2^2 + b_4 * \sqrt{X_3} + b_5 * \log(X_4)$$

**Table S8:** Estimated Coefficients and Significance Levels for the Nonlinear Regression Model

| Term             | Estimate | SE      | tStat   | pValue    |
|------------------|----------|---------|---------|-----------|
| <b>Intercept</b> | -0.12979 | 1.4028  | -0.0925 | 0.92795   |
| <b>b2</b>        | -0.19425 | 0.22474 | -0.8643 | 0.40586   |
| <b>b3</b>        | 0.90651  | 0.16999 | 5.3327  | 0.0002401 |
| <b>b4</b>        | 2.0515   | 0.81319 | 2.5228  | 0.02833   |
| <b>b5</b>        | -0.9312  | 0.64784 | -1.4374 | 0.17844   |

The non-linear regression model performs poor than the linear model, as both the regression coefficients and p-values indicate a stronger, more reliable fit for the linear case.

### 8. PCA Analysis

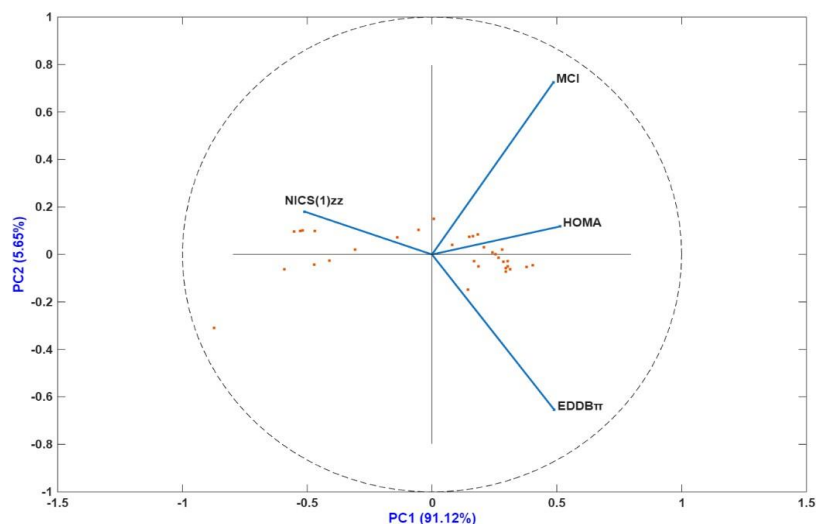

**Figure S9:** PCA plot of different aromatic indicators

**Table S9.** Variable Contributes to Each Principal Component

| Variable   | NICS(1) <sub>zz</sub> % | HOMA % | EDDB <sub>π</sub> % | MCI % |
|------------|-------------------------|--------|---------------------|-------|
| <b>PC1</b> | 26.14                   | 26.28  | 23.84               | 23.74 |
| <b>PC2</b> | 2.35                    | 1.77   | 46.39               | 49.47 |

PC1 accounts for 91% of the variance, indicating that it is the primary source of variation within the dataset. (Table S9) highlights the contribution of the variables to the two principal components (PC1 and PC2). Notably, all variables contribute substantially to PC1, with NICS(1)<sub>zz</sub> (26.14%) and HOMA (26.28%) having the greatest impact. PC1 likely represents the shared aromatic factor, as all these variables represent aromatic indicators. Orthogonal to PC1, the less dominant secondary variation, PC2, accounts for 5.65% of the variance in the data, with the most significant impact on MCI (49.47%), followed by EDDB<sub>π</sub> (46.39%). Although HOMA makes the largest contribution to PC1 (26.28%), the total contribution of all aromatic descriptors is similar, as shown in Table S10.

**Table S10.** Variable Contribution of Principal Component Analysis

Total Contribution = (PC1 Variance × Contribution to PC1) + (PC2 Variance × Contribution to PC2)

| Variable     | NICS(1) <sub>zz</sub> | HOMA  | EDDB <sub>π</sub> | MCI   |
|--------------|-----------------------|-------|-------------------|-------|
| Contribution | 24.06                 | 24.27 | 25.18             | 25.31 |

**Table S11.** Eigen vectors for Principal Component Analysis

| Principal Component | Eigen Values | NICS(1) <sub>zz</sub> | HOMA    | EDDB <sub>π</sub> | MCI     |
|---------------------|--------------|-----------------------|---------|-------------------|---------|
| PC1                 | 3.63044      | -0.51126              | 0.51265 | 0.48822           | 0.48728 |
| PC1                 | 0.231        | 0.15345               | 0.13321 | -0.68118          | 0.70335 |

**Table S12:** Principal components loadings

|                             | PC1      | PC2      | PC3      | PC4       | PC5       |
|-----------------------------|----------|----------|----------|-----------|-----------|
| <b>NICS(1)<sub>zz</sub></b> | 0.45995  | -0.1049  | 0.72664  | -0.22443  | 0.44617   |
| <b>EDDB<sub>π</sub></b>     | -0.44466 | 0.48379  | 0.49128  | -0.38573  | -0.42199  |
| <b>HOMA</b>                 | -0.45334 | -0.29907 | 0.45264  | 0.70704   | 0.015507  |
| <b>Spin density(R)</b>      | 0.45379  | 0.38798  | -0.15355 | -0.045788 | 0.78605   |
| <b>Spin density(5MR)</b>    | 0.42341  | 0.71762  | 0.046672 | 0.54666   | -0.068806 |

**Table S13:** Variable Contributions:

|                             | PC1    | PC2    | PC3     | PC4     | PC5      |
|-----------------------------|--------|--------|---------|---------|----------|
| <b>NICS(1)<sub>zz</sub></b> | 21.155 | 1.1003 | 52.8    | 5.0371  | 19.907   |
| <b>EDDB<sub>π</sub></b>     | 19.773 | 23.405 | 24.135  | 14.879  | 17.808   |
| <b>HOMA</b>                 | 20.552 | 8.9442 | 20.489  | 49.991  | 0.024047 |
| <b>Spin density(R)</b>      | 20.592 | 15.053 | 2.3577  | 0.20965 | 61.788   |
| <b>Spin density(5MR)</b>    | 17.928 | 51.497 | 0.21782 | 29.883  | 0.47342  |

**Table S14:** Comparative aromaticity indices for the T<sub>1</sub> state of compounds A-P calculated at M06-2X/def2-TZVPP and CAM-B3LYP/def2-TZVPP levels of theory.

| Molecule | M06-2X/T <sub>1</sub> |        |                   |       | CAM-B3LYP/T <sub>1</sub> |        |                   |       |
|----------|-----------------------|--------|-------------------|-------|--------------------------|--------|-------------------|-------|
|          | HOMA                  | NICS   | EDDB <sub>π</sub> | MCI   | HOMA                     | NICS   | EDDB <sub>π</sub> | MCI   |
| A        | 0.892                 | -22.91 | 3.71              | 0.558 | 0.894                    | -21.16 | 3.37              | 0.552 |
| B        | 0.381                 | 10.77  | 2.28              | 0.466 | 0.405                    | 10.35  | 2.24              | 0.453 |
| C        | 0.261                 | 14.88  | 2.18              | 0.434 | 0.292                    | 14.51  | 2.18              | 0.418 |
| D        | 0.186                 | -17.32 | 2.07              | 0.418 | 0.232                    | 16.71  | 2.04              | 0.394 |
| E        | 0.465                 | -7.30  | 2.27              | 0.511 | 0.524                    | -7.18  | 2.62              | 0.504 |
| F        | 0.649                 | -7.05  | 2.42              | 0.531 | 0.694                    | -7.62  | 2.74              | 0.517 |
| G        | 0.108                 | 18.91  | 1.57              | 0.378 | 0.157                    | 18.01  | 1.91              | 0.354 |
| H        | 0.269                 | 17.71  | 1.35              | 0.240 | -0.180                   | 24.07  | 1.66              | 0.251 |
| I        | 0.924                 | -24.3  | 3.67              | 0.473 | 0.928                    | -22.74 | 3.50              | 0.532 |
| J        | 0.950                 | -25.83 | 4.15              | 0.559 | 0.956                    | -24.86 | 4.03              | 0.542 |
| K        | 0.865                 | -23.03 | 3.44              | 0.527 | 0.873                    | -21.68 | 3.32              | 0.512 |
| L        | 0.924                 | -23.91 | 3.61              | 0.526 | 0.876                    | -22.32 | 3.49              | 0.513 |
| M        | 0.277                 | 19.72  | 1.10              | 0.434 | 0.302                    | 17.77  | 1.31              | 0.405 |
| N        | 0.399                 | 12.11  | 0.93              | 0.426 | 0.408                    | 7.7    | 1.16              | 0.402 |
| O        | 0.174                 | 21.0   | 1.11              | 0.435 | 0.107                    | 21.67  | 1.39              | 0.393 |
| P        | 0.139                 | 17.7   | 1.17              | 0.445 | 0.106                    | 17.46  | 1.43              | 0.403 |

The table above shows comparative aromaticity indices using the M06-2X and range-separated CAM-B3LYP functionals. The qualitative classification of all A-P systems as aromatic or antiaromatic is identical for both functions. Aromatic systems consistently exhibit negative NICS and high HOMA, EDDB<sub>π</sub>, and MCI values with both methods, while antiaromatic systems show positive NICS and low values for the aromaticity indices. Although we observed minor variations in the quantitative values of the descriptors, the overall qualitative trends remain entirely consistent. Based on these results, we are confident that our main findings regarding triplet-state aromaticity are robust and method-independent, thereby firmly supporting our original conclusions based on M06-2X.

**Table S15:** Comparison of TD-DFT vertical and UDFT adiabatic singlet–triplet gaps for A–P.

| SYSTEM   | TD-DFT<br>Vertical $T_1$ (eV) | Dominant Orbital<br>Character                                 | $\langle S^2 \rangle$ | UDFT<br>Adiabatic $\Delta E$ (eV) |
|----------|-------------------------------|---------------------------------------------------------------|-----------------------|-----------------------------------|
| <b>A</b> | 1.265                         | 32 $\rightarrow$ 34                                           | 2.000                 | 1.233                             |
| <b>B</b> | 2.695                         | 36 $\rightarrow$ 38, 37 $\rightarrow$ 38                      | 2.000                 | 2.328                             |
| <b>C</b> | 3.089                         | 32 $\rightarrow$ 34, 33 $\rightarrow$ 34                      | 2.000                 | 2.816                             |
| <b>D</b> | 3.264                         | 36 $\rightarrow$ 38, 37 $\rightarrow$ 38                      | 2.000                 | 2.919                             |
| <b>E</b> | 4.180                         | 29 $\rightarrow$ 31, 30 $\rightarrow$ 31                      | 2.000                 | 3.893                             |
| <b>F</b> | 4.170                         | 29 $\rightarrow$ 31, 30 $\rightarrow$ 31                      | 2.000                 | 3.083                             |
| <b>G</b> | 3.568                         | 36 $\rightarrow$ 38, 37 $\rightarrow$ 38                      | 2.000                 | 3.151                             |
| <b>H</b> | 4.126                         | 31 $\rightarrow$ 34, 32 $\rightarrow$ 34                      | 2.000                 | 3.589                             |
| <b>I</b> | 0.699                         | 74 $\rightarrow$ 76, 74 $\rightarrow$ 78                      | 2.000                 | 0.770                             |
| <b>J</b> | 3.002                         | 74 $\rightarrow$ 80, 74 $\rightarrow$ 82                      | 2.000                 | 2.831                             |
| <b>K</b> | 3.322                         | 73 $\rightarrow$ 76, 73 $\rightarrow$ 77, 73 $\rightarrow$ 80 | 2.000                 | 3.148                             |
| <b>L</b> | 3.488                         | 77 $\rightarrow$ 80, 77 $\rightarrow$ 81, 77 $\rightarrow$ 83 | 2.000                 | 3.148                             |
| <b>M</b> | 3.137                         | 72 $\rightarrow$ 73                                           | 2.000                 | 2.811                             |
| <b>N</b> | 3.130                         | 72 $\rightarrow$ 73                                           | 2.000                 | 2.596                             |
| <b>O</b> | 3.676                         | 79 $\rightarrow$ 80, 79 $\rightarrow$ 81                      | 2.000                 | 3.246                             |
| <b>P</b> | 3.601                         | 74 $\rightarrow$ 75, 72 $\rightarrow$ 76                      | 2.000                 | 3.227                             |

Across systems A–P, UDFT triplet optimizations confirmed the same singly occupied orbitals and yielded adiabatic singlet–triplet gaps ( $\Delta E$ ) in close agreement with the TD-DFT vertical energies. The orbital transitions defining the  $T_1$  state in TD-DFT match the singly occupied molecular orbitals (SOMOs) obtained from our unrestricted DFT (UDFT) optimizations, confirming consistent electronic character. TD-DFT consistently yields spin expectation value  $\langle S^2 \rangle = 2.0$  across all systems, confirming pure triplet character with negligible spin contamination.

Additionally, we compared the UDFT- and TD-DFT-optimized  $T_1$  geometries for the adaptive aromatic systems **A**, **I**, **J**, **K**, and **L**. As anticipated, both methods give very similar geometries for the  $T_1$  structure. Key geometric parameters (core aromatic bond lengths, ring planarity) are in close agreement, with only small quantitative differences in bond distances. This confirms that our qualitative conclusions about  $T_1$  aromaticity are preserved regardless of whether UDFT or TD-DFT is used for geometry optimization, demonstrating the robustness of our results.

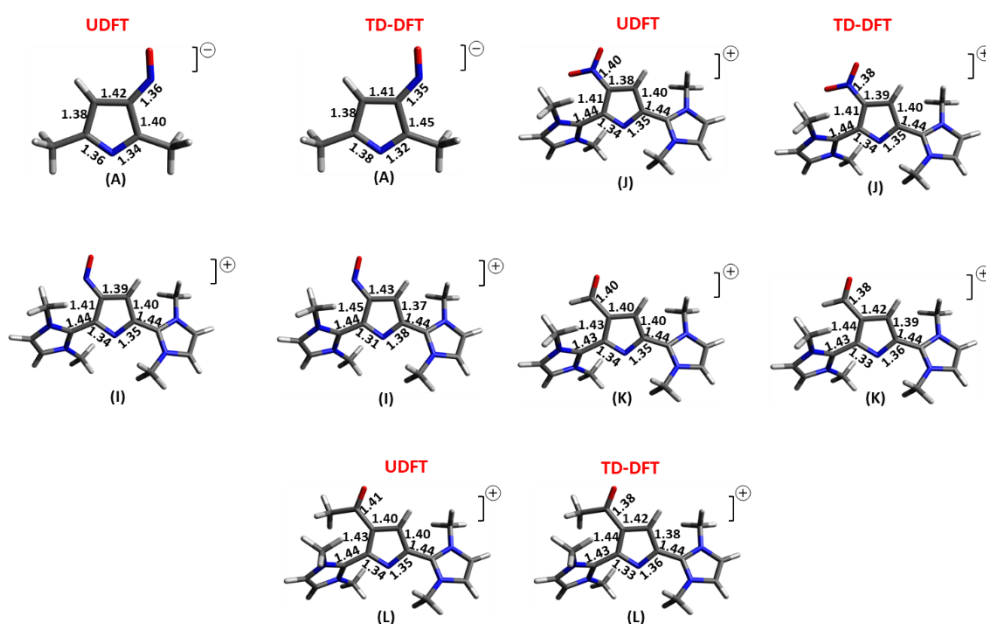**Figure S10:** Comparison of the optimized  $T_1$  triplet state geometries of adaptive aromatic systems **A**, **I**, **J**, **K**, and **L**, calculated at the M06-2X/def2-TZVPP level of theory with unrestricted DFT (UDFT) and linear-response TD-DFT. Key bond lengths are given in angstroms ( $\text{\AA}$ ), and all systems are classified as adaptively aromatic in the triplet state.

## 9. Optimized Coordinates

Computational Method: All molecules are optimized using Gaussian 16 the following method Method: M06-2X; Basis Set: def2-TZVPP

Optimized molecular coordinates for systems I-VI in the singlet ( $S_0$ ) and triplet ( $T_1$ ) electronic states.

### I ( $S_0$ )

**Total Energy: -287.842907 a.u**

| Atomic<br>Number | Coordinates (Angstroms) |           |           |
|------------------|-------------------------|-----------|-----------|
|                  | X                       | Y         | Z         |
| 6                | -1.057797               | -0.149787 | -0.000071 |
| 6                | -0.660907               | 1.314583  | 0.000056  |
| 6                | 0.660922                | 1.314577  | 0.000031  |
| 6                | 1.057800                | -0.149773 | -0.000064 |
| 7                | -0.000005               | -0.955984 | -0.000113 |
| 1                | -1.356710               | 2.138629  | 0.000127  |
| 1                | 1.356728                | 2.138621  | 0.000082  |
| 6                | -2.426517               | -0.620110 | -0.000015 |
| 1                | -2.941357               | -0.180122 | 0.865838  |
| 1                | -2.942062               | -0.179065 | -0.864868 |
| 1                | -2.498415               | -1.701570 | -0.000539 |
| 6                | 2.426508                | -0.620123 | -0.000020 |
| 1                | 2.498385                | -1.701584 | -0.000812 |
| 1                | 2.942232                | -0.178810 | -0.864618 |
| 1                | 2.941188                | -0.180415 | 0.866082  |

### I ( $T_1$ )

**Total Energy: -287.806901 a.u**

| Atomic<br>Number | Coordinates (Angstroms) |           |           |
|------------------|-------------------------|-----------|-----------|
|                  | X                       | Y         | Z         |
| 6                | -1.103421               | -0.079228 | 0.000038  |
| 6                | -0.721769               | 1.289238  | -0.000014 |
| 6                | 0.721777                | 1.289228  | 0.000018  |
| 6                | 1.103411                | -0.079238 | 0.000033  |
| 7                | -0.000005               | -0.871344 | -0.000052 |
| 1                | -1.374186               | 2.148980  | -0.000130 |
| 1                | 1.374206                | 2.148961  | 0.000007  |
| 6                | -2.458458               | -0.647930 | 0.000023  |
| 1                | -2.575275               | -1.295240 | 0.873330  |
| 1                | -3.227059               | 0.118548  | 0.000101  |
| 1                | -2.575268               | -1.294995 | -0.873483 |
| 6                | 2.458463                | -0.647930 | 0.000004  |
| 1                | 2.575315                | -1.294831 | -0.873607 |
| 1                | 3.227070                | 0.118535  | 0.000324  |
| 1                | 2.575215                | -1.295398 | 0.873208  |

### II ( $S_0$ )

**Total Energy: -288.199257 a.u**

| Atomic<br>Number | Coordinates (Angstroms) |           |           |
|------------------|-------------------------|-----------|-----------|
|                  | X                       | Y         | Z         |
| 6                | -1.080393               | -0.074109 | -0.000003 |
| 6                | -0.708651               | 1.268730  | 0.000003  |
| 6                | 0.708665                | 1.268729  | -0.000003 |

|   |           |           |           |
|---|-----------|-----------|-----------|
| 6 | 1.080401  | -0.074124 | -0.000017 |
| 7 | -0.000006 | -0.892011 | -0.000015 |
| 1 | -1.372452 | 2.123612  | 0.000020  |
| 1 | 1.372468  | 2.123609  | 0.000001  |
| 6 | -2.470694 | -0.635524 | 0.000010  |
| 1 | -3.211130 | 0.168078  | 0.000062  |
| 1 | -2.655073 | -1.262029 | -0.878865 |
| 1 | -2.655049 | -1.262134 | 0.878816  |
| 6 | 2.470681  | -0.635532 | 0.000013  |
| 1 | 2.655030  | -1.262192 | -0.878763 |
| 1 | 3.211113  | 0.168078  | -0.000106 |
| 1 | 2.655080  | -1.261972 | 0.878929  |

---

### II (T<sub>1</sub>)

**Total Energy: -288.053509 a.u**

---

| Atomic<br>Number | Coordinates (Angstroms) |           |           |
|------------------|-------------------------|-----------|-----------|
|                  | X                       | Y         | Z         |
| 6                | 1.151344                | 0.131323  | 0.487696  |
| 6                | 0.802051                | -1.327100 | 0.226269  |
| 6                | -0.516076               | -1.263655 | -0.212536 |
| 6                | -0.989170               | 0.053057  | 0.047883  |
| 7                | -0.082443               | 0.865087  | 0.599715  |
| 1                | 1.497744                | -2.149837 | 0.156352  |
| 1                | -1.117146               | -2.058743 | -0.638279 |
| 6                | 2.143493                | 0.764073  | -0.463599 |
| 1                | 3.102243                | 0.238306  | -0.448739 |
| 1                | 1.754447                | 0.720942  | -1.496098 |
| 1                | 2.301638                | 1.814413  | -0.207363 |
| 6                | -2.381034               | 0.535492  | -0.210569 |
| 1                | -2.405169               | 1.279385  | -1.014741 |
| 1                | -3.044309               | -0.287855 | -0.484142 |
| 1                | -2.776003               | 1.028639  | 0.684141  |

---

### III (S<sub>0</sub>)

**Total Energy: -286.517231 a.u**

---

| Atomic<br>Number | Coordinates (Angstroms) |           |           |
|------------------|-------------------------|-----------|-----------|
|                  | X                       | Y         | Z         |
| 6                | 3.071880                | -0.359717 | 0.431128  |
| 6                | -1.153245               | -0.095746 | -0.001557 |
| 6                | -0.710616               | 1.303918  | -0.141442 |
| 6                | 0.706984                | 1.303550  | -0.137209 |
| 7                | 1.152841                | -0.096281 | -0.004574 |
| 1                | 0.001932                | -0.293321 | 0.754740  |
| 1                | -1.339558               | 2.170648  | 0.120543  |
| 6                | 1.334947                | 2.168462  | 0.133482  |
| 1                | -2.276606               | -0.899166 | -0.201830 |
| 1                | -3.101367               | -0.338848 | 0.370654  |
| 1                | -2.719726               | -0.737143 | -1.216099 |
| 6                | -2.216819               | -1.932747 | 0.147887  |
| 1                | 2.278956                | -0.896077 | -0.210513 |
| 1                | 2.210330                | -1.939068 | 0.110489  |
| 1                | 2.756900                | -0.699519 | -1.198515 |

---

### III (T<sub>1</sub>)

**Total energy: -286.518080 a.u**

---

| Atomic<br>Number | Coordinates (Angstroms) |           |           |
|------------------|-------------------------|-----------|-----------|
|                  | X                       | Y         | Z         |
| 6                | -0.712566               | 1.301345  | 0.000001  |
| 6                | -1.184301               | -0.152864 | -0.000012 |
| 6                | 0.712575                | 1.301344  | -0.000002 |
| 6                | 1.184305                | -0.152866 | 0.000000  |
| 7                | -0.000004               | -0.795991 | -0.000016 |
| 1                | -1.378516               | 2.172986  | 0.000012  |
| 1                | 1.378525                | 2.172984  | -0.000010 |
| 6                | -2.485456               | -0.686248 | 0.000003  |
| 1                | -3.081303               | -0.193252 | 0.827473  |
| 1                | -3.081390               | -0.193184 | -0.827358 |
| 1                | -2.568112               | -1.773937 | -0.000029 |
| 6                | 2.485444                | -0.686260 | 0.000012  |
| 1                | 2.568110                | -1.773947 | 0.000041  |
| 1                | 3.081349                | -0.193244 | -0.827410 |
| 1                | 3.081367                | -0.193173 | 0.827377  |

**IV (S<sub>0</sub>)**

**Total Energy: -817.849857 a.u**

| Atomic<br>Number | Coordinates (Angstroms) |           |           |
|------------------|-------------------------|-----------|-----------|
|                  | X                       | Y         | Z         |
| 6                | 1.068719                | -0.586634 | -0.032312 |
| 6                | 0.691199                | -1.947086 | -0.017473 |
| 6                | -0.691199               | -1.947086 | 0.017473  |
| 6                | -1.068719               | -0.586634 | 0.032313  |
| 6                | -2.396412               | -0.033652 | 0.094763  |
| 6                | -4.592600               | 0.239389  | -0.117927 |
| 6                | -4.098116               | 1.339449  | 0.485453  |
| 1                | -5.596165               | -0.020304 | -0.400093 |
| 1                | -4.586599               | 2.229293  | 0.837289  |
| 7                | -2.739798               | 1.157453  | 0.616907  |
| 7                | -3.528975               | -0.601226 | -0.360786 |
| 6                | -1.844162               | 2.108126  | 1.264270  |
| 1                | -1.147259               | 1.569485  | 1.898009  |
| 1                | -1.281183               | 2.660899  | 0.517821  |
| 1                | -2.452866               | 2.783996  | 1.857767  |
| 6                | -3.633882               | -1.878936 | -1.050312 |
| 1                | -3.679503               | -2.697129 | -0.334737 |
| 1                | -4.541868               | -1.868107 | -1.645751 |
| 1                | -2.771228               | -2.007263 | -1.698465 |
| 6                | 2.396412                | -0.033652 | -0.094763 |
| 6                | 4.098116                | 1.339449  | -0.485454 |
| 6                | 4.592601                | 0.239389  | 0.117926  |
| 1                | 4.586599                | 2.229293  | -0.837289 |
| 1                | 5.596165                | -0.020304 | 0.400093  |
| 7                | 3.528976                | -0.601226 | 0.360786  |
| 7                | 2.739798                | 1.157453  | -0.616907 |
| 6                | 3.633882                | -1.878936 | 1.050312  |
| 1                | 2.771229                | -2.007263 | 1.698465  |
| 1                | 3.679503                | -2.697129 | 0.334737  |
| 1                | 4.541869                | -1.868107 | 1.645750  |
| 6                | 1.844162                | 2.108126  | -1.264269 |
| 1                | 1.281183                | 2.660899  | -0.517821 |
| 1                | 2.452865                | 2.783996  | -1.857766 |
| 1                | 1.147259                | 1.569485  | -1.898009 |
| 7                | 0.000000                | 0.235787  | 0.000000  |
| 1                | 1.328637                | -2.813646 | -0.057961 |

1 -1.328637 -2.813646 0.057961

-----  
**IV (T<sub>1</sub>)**

**Total Energy: -817.741716 a.u**

-----

| Atomic<br>Number | Coordinates (Angstroms) |           |           |
|------------------|-------------------------|-----------|-----------|
|                  | X                       | Y         | Z         |
| 6                | 1.089778                | -0.551732 | 0.002761  |
| 6                | 0.668237                | -1.967253 | 0.002968  |
| 6                | -0.668237               | -1.967253 | -0.002969 |
| 6                | -1.089778               | -0.551732 | -0.002761 |
| 6                | -2.388222               | -0.048411 | 0.010777  |
| 6                | -4.621398               | 0.144976  | -0.004719 |
| 6                | -4.101104               | 1.394967  | 0.055153  |
| 1                | -5.645777               | -0.179215 | -0.031882 |
| 1                | -4.596125               | 2.348144  | 0.093790  |
| 7                | -2.739875               | 1.289502  | 0.062793  |
| 7                | -3.584458               | -0.743496 | -0.032475 |
| 6                | -1.847854               | 2.434218  | 0.147574  |
| 1                | -1.231151               | 2.364177  | 1.039486  |
| 1                | -1.199570               | 2.472197  | -0.722934 |
| 1                | -2.467881               | 3.325293  | 0.192278  |
| 6                | -3.756159               | -2.178796 | -0.122476 |
| 1                | -3.358088               | -2.669835 | 0.764073  |
| 1                | -4.819968               | -2.385109 | -0.189833 |
| 1                | -3.265120               | -2.565338 | -1.014019 |
| 6                | 2.388222                | -0.048411 | -0.010777 |
| 6                | 4.101104                | 1.394967  | -0.055153 |
| 6                | 4.621398                | 0.144976  | 0.004719  |
| 1                | 4.596125                | 2.348144  | -0.093790 |
| 1                | 5.645777                | -0.179216 | 0.031882  |
| 7                | 3.584458                | -0.743496 | 0.032475  |
| 7                | 2.739875                | 1.289502  | -0.062793 |
| 6                | 3.756159                | -2.178796 | 0.122476  |
| 1                | 3.265119                | -2.565338 | 1.014019  |
| 1                | 3.358088                | -2.669835 | -0.764073 |
| 1                | 4.819968                | -2.385109 | 0.189834  |
| 6                | 1.847854                | 2.434218  | -0.147575 |
| 1                | 1.199570                | 2.472197  | 0.722933  |
| 1                | 2.467881                | 3.325293  | -0.192278 |
| 1                | 1.231152                | 2.364176  | -1.039486 |
| 7                | 0.000000                | 0.268989  | 0.000000  |
| 1                | 1.292674                | -2.841640 | 0.002472  |
| 1                | -1.292674               | -2.841640 | -0.002473 |

-----

**V (S<sub>0</sub>)**

**Total Energy: -817.941061 a.u**

-----

| Atomic<br>Number | Coordinates (Angstroms) |           |           |
|------------------|-------------------------|-----------|-----------|
|                  | X                       | Y         | Z         |
| 6                | 1.068031                | -0.493629 | -0.115756 |
| 6                | 0.640457                | -1.885223 | -0.240243 |
| 6                | -0.707133               | -1.893690 | -0.176146 |
| 6                | -1.135652               | -0.505797 | -0.004802 |
| 6                | -2.418935               | -0.036818 | 0.097335  |
| 6                | -4.677527               | 0.160798  | 0.247603  |
| 6                | -4.174212               | 1.397904  | 0.214679  |
| 1                | -5.698636               | -0.165139 | 0.353346  |
| 1                | -4.685067               | 2.344637  | 0.265337  |

-----

|   |           |           |           |
|---|-----------|-----------|-----------|
| 7 | -2.777431 | 1.340187  | 0.190953  |
| 7 | -3.633857 | -0.761197 | 0.262301  |
| 6 | -2.088289 | 2.308999  | -0.645626 |
| 1 | -1.017285 | 2.202221  | -0.495469 |
| 1 | -2.314375 | 2.139679  | -1.708457 |
| 1 | -2.426225 | 3.308602  | -0.366153 |
| 6 | -3.812573 | -2.096528 | -0.230171 |
| 1 | -3.299066 | -2.821583 | 0.402656  |
| 1 | -4.877163 | -2.330991 | -0.226141 |
| 1 | -3.423985 | -2.199960 | -1.252908 |
| 6 | 2.368546  | -0.079684 | -0.115060 |
| 6 | 4.143616  | 1.258041  | -0.464409 |
| 6 | 4.579378  | -0.000538 | -0.563296 |
| 1 | 4.694792  | 2.173574  | -0.620922 |
| 1 | 5.564097  | -0.353315 | -0.828173 |
| 7 | 3.534668  | -0.922269 | -0.292900 |
| 7 | 2.778782  | 1.296902  | -0.180137 |
| 6 | 3.858443  | -1.797495 | 0.832560  |
| 1 | 4.023279  | -1.221247 | 1.755650  |
| 1 | 3.039573  | -2.492929 | 1.002318  |
| 1 | 4.763702  | -2.366255 | 0.600303  |
| 6 | 2.338946  | 2.188175  | 0.879920  |
| 1 | 2.783554  | 1.913579  | 1.849654  |
| 1 | 2.626389  | 3.213638  | 0.634032  |
| 1 | 1.255358  | 2.112872  | 0.954546  |
| 7 | -0.025522 | 0.317294  | 0.029548  |
| 1 | 1.286500  | -2.733639 | -0.413640 |
| 1 | -1.330487 | -2.767257 | -0.273867 |

V (T<sub>1</sub>)

Total energy: -817.923835 a.u

| Atomic<br>Number | Coordinates (Angstroms) |           |           |
|------------------|-------------------------|-----------|-----------|
|                  | X                       | Y         | Z         |
| 6                | 1.067191                | -0.560168 | -0.167801 |
| 6                | 0.744559                | -1.819787 | -0.707818 |
| 6                | -0.656571               | -1.836497 | -0.819367 |
| 6                | -1.098223               | -0.599532 | -0.324697 |
| 6                | -2.466966               | -0.105994 | -0.237582 |
| 6                | -4.492854               | 0.210993  | 0.727364  |
| 6                | -4.036990               | 1.414065  | 0.340860  |
| 1                | -5.420565               | -0.049020 | 1.208799  |
| 1                | -4.503683               | 2.381442  | 0.420918  |
| 7                | -2.738633               | 1.276968  | -0.121919 |
| 7                | -3.488920               | -0.729892 | 0.533554  |
| 6                | -2.184397               | 2.189772  | -1.090232 |
| 1                | -1.108092               | 2.039046  | -1.128941 |
| 1                | -2.611508               | 2.010380  | -2.087837 |
| 1                | -2.399686               | 3.214325  | -0.783931 |
| 6                | -3.792149               | -2.119996 | 0.330930  |
| 1                | -2.891628               | -2.709715 | 0.491529  |
| 1                | -4.557097               | -2.429781 | 1.044175  |
| 1                | -4.150640               | -2.304556 | -0.694069 |
| 6                | 2.380111                | -0.045121 | 0.135136  |
| 6                | 4.123681                | 1.372058  | -0.072376 |
| 6                | 4.617112                | 0.129751  | -0.151123 |
| 1                | 4.641546                | 2.316359  | -0.117308 |
| 1                | 5.635545                | -0.195019 | -0.286349 |
| 7                | 3.564292                | -0.793614 | -0.124885 |

|   |           |           |           |
|---|-----------|-----------|-----------|
| 7 | 2.738811  | 1.322910  | 0.001591  |
| 6 | 3.774095  | -1.999200 | 0.655460  |
| 1 | 3.941675  | -1.753551 | 1.714489  |
| 1 | 2.894034  | -2.632067 | 0.583739  |
| 1 | 4.639883  | -2.538527 | 0.266698  |
| 6 | 2.026608  | 2.327730  | 0.764778  |
| 1 | 2.245251  | 2.225929  | 1.838108  |
| 1 | 2.333899  | 3.318602  | 0.424932  |
| 1 | 0.959908  | 2.184210  | 0.614371  |
| 7 | -0.053452 | 0.175484  | 0.067442  |
| 1 | 1.435318  | -2.577803 | -1.045532 |
| 1 | -1.270079 | -2.611690 | -1.255477 |

-----  
**VI (S<sub>0</sub>)**

**Total Energy: -816.954609 a.u**

| Atomic<br>Number | Coordinates (Angstroms) |           |           |
|------------------|-------------------------|-----------|-----------|
|                  | X                       | Y         | Z         |
| 6                | 1.071488                | -0.525621 | -0.003156 |
| 6                | 0.664664                | -1.960173 | -0.005440 |
| 6                | -0.664727               | -1.960150 | 0.005777  |
| 6                | -1.071508               | -0.525630 | 0.003227  |
| 6                | -2.386127               | -0.028146 | -0.009132 |
| 6                | -4.590498               | 0.085345  | 0.011880  |
| 6                | -4.078599               | 1.389154  | -0.065760 |
| 1                | -5.618313               | -0.244376 | 0.046158  |
| 1                | -4.607053               | 2.329642  | -0.114487 |
| 7                | -2.757026               | 1.299243  | -0.074068 |
| 7                | -3.561904               | -0.750450 | 0.042606  |
| 6                | -1.873900               | 2.475202  | -0.160971 |
| 1                | -1.246016               | 2.507573  | 0.723574  |
| 1                | -1.269914               | 2.392971  | -1.059570 |
| 1                | -2.509549               | 3.353794  | -0.209911 |
| 6                | -3.744460               | -2.215296 | 0.133772  |
| 1                | -3.257722               | -2.585008 | 1.032114  |
| 1                | -4.811503               | -2.403070 | 0.203081  |
| 1                | -3.357087               | -2.683971 | -0.767100 |
| 6                | 2.386135                | -0.028154 | 0.009120  |
| 6                | 4.078616                | 1.389144  | 0.065686  |
| 6                | 4.590506                | 0.085346  | -0.012030 |
| 1                | 4.607067                | 2.329632  | 0.114422  |
| 1                | 5.618317                | -0.244377 | -0.046390 |
| 7                | 3.561901                | -0.750458 | -0.042712 |
| 7                | 2.757032                | 1.299230  | 0.074078  |
| 6                | 3.744476                | -2.215299 | -0.133917 |
| 1                | 3.357475                | -2.683964 | 0.767121  |
| 1                | 3.257426                | -2.585059 | -1.032066 |
| 1                | 4.811500                | -2.403031 | -0.203642 |
| 6                | 1.873914                | 2.475189  | 0.161079  |
| 1                | 1.269886                | 2.392854  | 1.059638  |
| 1                | 2.509566                | 3.353770  | 0.210171  |
| 1                | 1.246074                | 2.507680  | -0.723494 |
| 7                | 0.000003                | 0.284585  | -0.000034 |
| 1                | 1.298815                | -2.827806 | -0.007033 |
| 1                | -1.298898               | -2.827767 | 0.007519  |

-----  
**VI (T<sub>1</sub>)**

**Total energy: -816.916134 a.u**

| Atomic<br>Number | Coordinates (Angstroms) |           |           |
|------------------|-------------------------|-----------|-----------|
|                  | X                       | Y         | Z         |
| 6                | 1.093776                | -0.587025 | 0.026569  |
| 6                | 0.684254                | -1.956098 | 0.010469  |
| 6                | -0.684250               | -1.956098 | -0.010379 |
| 6                | -1.093776               | -0.587027 | -0.026527 |
| 6                | -2.395662               | -0.032720 | -0.047111 |
| 6                | -4.597808               | 0.132799  | 0.057421  |
| 6                | -4.067801               | 1.397773  | -0.241806 |
| 1                | -5.627467               | -0.164238 | 0.193935  |
| 1                | -4.582633               | 2.331108  | -0.415949 |
| 7                | -2.740678               | 1.276331  | -0.294495 |
| 7                | -3.574018               | -0.713630 | 0.165856  |
| 6                | -1.843906               | 2.401141  | -0.618632 |
| 1                | -1.239616               | 2.631928  | 0.252575  |
| 1                | -1.220979               | 2.126824  | -1.464402 |
| 1                | -2.470712               | 3.249170  | -0.876891 |
| 6                | -3.735413               | -2.140375 | 0.507610  |
| 1                | -3.090012               | -2.382038 | 1.348348  |
| 1                | -4.771801               | -2.293071 | 0.793431  |
| 1                | -3.507640               | -2.748733 | -0.364733 |
| 6                | 2.395665                | -0.032722 | 0.047117  |
| 6                | 4.067811                | 1.397766  | 0.241764  |
| 6                | 4.597806                | 0.132792  | -0.057484 |
| 1                | 4.582651                | 2.331099  | 0.415896  |
| 1                | 5.627460                | -0.164246 | -0.194033 |
| 7                | 3.574011                | -0.713635 | -0.165889 |
| 7                | 2.740689                | 1.276327  | 0.294493  |
| 6                | 3.735385                | -2.140380 | -0.507656 |
| 1                | 3.507666                | -2.748740 | 0.364699  |
| 1                | 3.089928                | -2.382042 | -1.348353 |
| 1                | 4.771754                | -2.293076 | -0.793545 |
| 6                | 1.843920                | 2.401126  | 0.618675  |
| 1                | 1.221032                | 2.126796  | 1.464469  |
| 1                | 2.470727                | 3.249161  | 0.876914  |
| 1                | 1.239591                | 2.631912  | -0.252504 |
| 7                | 0.000002                | 0.244380  | 0.000012  |
| 1                | 1.299876                | -2.837967 | 0.030612  |
| 1                | -1.299868               | -2.837971 | -0.030486 |

**Optimized molecular coordinates for systems A–P in the singlet ( $S_0$ ) and triplet ( $T_1$ ) electronic states.**

**A. NO ( $S_0$ )**

**Total energy = -417.541281 a.u**

| Atomic<br>Number | Coordinates (Angstroms) |   |   |
|------------------|-------------------------|---|---|
|                  | X                       | Y | Z |

---

|   |           |           |           |
|---|-----------|-----------|-----------|
| 6 | -1.510877 | 0.311275  | -0.000028 |
| 6 | -0.420329 | 1.135975  | -0.000037 |
| 6 | 0.710623  | 0.252979  | 0.000010  |
| 6 | 0.162784  | -1.063313 | 0.000029  |
| 7 | -1.158324 | -1.032683 | 0.000011  |
| 1 | -0.396784 | 2.213523  | -0.000053 |
| 6 | -2.957746 | 0.686780  | 0.000012  |
| 1 | -3.078354 | 1.770797  | 0.000043  |
| 1 | -3.468346 | 0.282613  | -0.878247 |
| 1 | -3.468298 | 0.282589  | 0.878291  |
| 6 | 0.937699  | -2.342313 | -0.000023 |
| 1 | 0.692059  | -2.942239 | 0.879139  |
| 1 | 0.693358  | -2.941453 | -0.880090 |
| 1 | 2.006015  | -2.132063 | 0.000813  |
| 7 | 2.041991  | 0.488609  | 0.000067  |
| 8 | 2.412720  | 1.673307  | -0.000028 |

-----  
**A. NO (T<sub>1</sub>)**

**Total energy = -417.495960 a.u**

-----

| Atomic<br>Number | Coordinates (Angstroms) |           |           |
|------------------|-------------------------|-----------|-----------|
|                  | X                       | Y         | Z         |
| 6                | -1.530948               | 0.327063  | -0.005147 |
| 6                | -0.404067               | 1.134908  | -0.013242 |
| 6                | 0.688675                | 0.220735  | -0.001986 |
| 6                | 0.125141                | -1.069881 | 0.009362  |
| 7                | -1.217442               | -0.998491 | 0.008138  |
| 1                | -0.346073               | 2.212125  | -0.017785 |
| 6                | -2.961621               | 0.768468  | 0.002791  |
| 1                | -3.031275               | 1.857218  | -0.030854 |
| 1                | -3.506648               | 0.365754  | -0.855652 |
| 1                | -3.481461               | 0.422827  | 0.901152  |
| 6                | 0.864287                | -2.368411 | -0.003494 |
| 1                | 0.370431                | -3.093085 | 0.646920  |
| 1                | 0.908285                | -2.808086 | -1.005767 |
| 1                | 1.891338                | -2.231784 | 0.340472  |
| 7                | 2.029139                | 0.496360  | -0.008775 |
| 8                | 2.603089                | 1.589082  | 0.012034  |

-----

**B. NO<sub>2</sub> (S<sub>0</sub>)**

**Total energy = -492.760104 a.u**

-----

| Atomic<br>Number | Coordinates (Angstroms) |           |           |
|------------------|-------------------------|-----------|-----------|
|                  | X                       | Y         | Z         |
| 6                | -1.825016               | 0.275705  | -0.000059 |
| 6                | -0.745648               | 1.122664  | -0.000054 |
| 6                | 0.383577                | 0.259696  | -0.000034 |
| 6                | -0.112193               | -1.066283 | -0.000012 |
| 7                | -1.441088               | -1.048753 | -0.000038 |
| 1                | -0.730779               | 2.199859  | -0.000063 |
| 6                | -3.277351               | 0.630363  | 0.000059  |
| 1                | -3.783764               | 0.222159  | 0.878785  |
| 1                | -3.412028               | 1.712844  | -0.000095 |
| 1                | -3.783874               | 0.221844  | -0.878420 |
| 6                | 0.654276                | -2.347574 | 0.000031  |
| 1                | -0.054473               | -3.175135 | -0.000203 |

|   |          |           |           |
|---|----------|-----------|-----------|
| 1 | 1.306831 | -2.421360 | -0.871740 |
| 1 | 1.306415 | -2.421531 | 0.872062  |
| 7 | 1.717772 | 0.653193  | 0.000006  |
| 8 | 1.989024 | 1.857071  | 0.000039  |
| 8 | 2.604604 | -0.209218 | 0.000000  |

-----

**B. NO2 (T1)**

**Total energy = -492.674539 a.u**

-----

| Atomic<br>Number | Coordinates (Angstroms) |           |           |
|------------------|-------------------------|-----------|-----------|
|                  | X                       | Y         | Z         |
| 6                | -1.842952               | 0.241809  | 0.000015  |
| 6                | -0.675272               | 1.119303  | -0.000024 |
| 6                | 0.406715                | 0.281703  | -0.000021 |
| 6                | -0.143962               | -1.074111 | 0.000026  |
| 7                | -1.517961               | -1.035513 | 0.000036  |
| 1                | -0.650307               | 2.195570  | -0.000055 |
| 6                | -3.257966               | 0.698814  | -0.000003 |
| 1                | -3.464612               | 1.317948  | 0.877490  |
| 1                | -3.464648               | 1.317822  | -0.877586 |
| 1                | -3.926274               | -0.159756 | 0.000064  |
| 6                | 0.586781                | -2.362399 | -0.000026 |
| 1                | -0.130564               | -3.182090 | 0.000385  |
| 1                | 1.246288                | -2.430602 | -0.866360 |
| 1                | 1.246999                | -2.430266 | 0.865795  |
| 7                | 1.735028                | 0.639559  | 0.000002  |
| 8                | 2.028529                | 1.887324  | 0.000001  |
| 8                | 2.619420                | -0.298281 | 0.000025  |

-----

**C. CHO (S0)**

**Total energy = -401.561461 a.u**

-----

| Atomic<br>Number | Coordinates (Angstroms) |           |           |
|------------------|-------------------------|-----------|-----------|
|                  | X                       | Y         | Z         |
| 6                | -1.546484               | 0.354523  | -0.000028 |
| 6                | -0.423984               | 1.144900  | -0.000026 |
| 6                | 0.685388                | 0.243332  | -0.000019 |
| 6                | 0.100847                | -1.050099 | -0.000017 |
| 7                | -1.227782               | -0.987450 | -0.000030 |
| 1                | -0.373650               | 2.223315  | -0.000033 |

|   |           |           |           |
|---|-----------|-----------|-----------|
| 6 | -2.980680 | 0.779958  | 0.000037  |
| 1 | -3.061115 | 1.868183  | 0.000058  |
| 1 | -3.508730 | 0.398461  | -0.878513 |
| 1 | -3.508657 | 0.398441  | 0.878620  |
| 6 | 0.802499  | -2.377185 | 0.000017  |
| 1 | 0.050793  | -3.166115 | -0.000467 |
| 1 | 1.439247  | -2.507331 | -0.878880 |
| 1 | 1.438459  | -2.507690 | 0.879454  |
| 8 | 2.638447  | 1.613343  | 0.000018  |
| 6 | 2.078366  | 0.519997  | 0.000004  |
| 1 | 2.714843  | -0.394417 | 0.000009  |

---

**C. CHO (T<sub>i</sub>)**

**Total energy = -401.457945 a.u**

---

| Atomic<br>Number | Coordinates (Angstroms) |   |   |
|------------------|-------------------------|---|---|
|                  | X                       | Y | Z |

---

|   |           |           |           |
|---|-----------|-----------|-----------|
| 6 | -1.563481 | 0.324088  | -0.000007 |
| 6 | -0.337242 | 1.123036  | -0.000037 |
| 6 | 0.718639  | 0.223203  | -0.000000 |
| 6 | 0.039497  | -1.087359 | 0.000046  |
| 7 | -1.335479 | -0.971611 | 0.000036  |
| 1 | -0.272969 | 2.199689  | -0.000082 |
| 6 | -2.943243 | 0.881215  | -0.000024 |
| 1 | -3.103002 | 1.514695  | 0.877936  |
| 1 | -3.102454 | 1.516016  | -0.877096 |
| 1 | -3.674455 | 0.075061  | -0.000820 |
| 6 | 0.735881  | -2.387110 | 0.000069  |
| 1 | 0.024360  | -3.211547 | 0.000074  |
| 1 | 1.397004  | -2.470058 | -0.873327 |
| 1 | 1.396994  | -2.470043 | 0.873453  |
| 8 | 2.661088  | 1.610568  | -0.000069 |
| 6 | 2.122594  | 0.457908  | -0.000020 |
| 1 | 2.758298  | -0.446959 | 0.000011  |

---

**D. COCH<sub>3</sub>  
(S<sub>0</sub>)**

**Total energy = -440.874442 a.u**

---

| Atomic<br>Number | Coordinates (Angstroms) |   |   |
|------------------|-------------------------|---|---|
|                  | X                       | Y | Z |

---

|   |           |           |           |
|---|-----------|-----------|-----------|
| 6 | 1.897536  | 0.280763  | 0.000004  |
| 6 | 0.816419  | 1.126697  | 0.000128  |
| 6 | -0.342435 | 0.291723  | 0.000203  |
| 6 | 0.172454  | -1.035028 | 0.000076  |
| 7 | 1.506631  | -1.036391 | -0.000062 |
| 1 | 0.814508  | 2.206142  | 0.000139  |
| 6 | 3.352271  | 0.631210  | -0.000081 |
| 1 | 3.488463  | 1.713947  | -0.000230 |
| 1 | 3.860578  | 0.223736  | 0.878594  |
| 1 | 3.860516  | 0.223490  | -0.878675 |
| 6 | -0.545163 | -2.353943 | -0.000023 |
| 1 | 0.207615  | -3.141583 | -0.001233 |
| 1 | -1.181249 | -2.490169 | 0.878851  |
| 1 | -1.183075 | -2.489093 | -0.877711 |
| 8 | -2.002526 | 1.963066  | -0.000114 |
| 6 | -1.694873 | 0.771043  | 0.000056  |
| 6 | -2.832738 | -0.247041 | -0.000031 |
| 1 | -2.779703 | -0.890924 | -0.878597 |
| 1 | -2.778509 | -0.892721 | 0.877118  |
| 1 | -3.776174 | 0.294852  | 0.001088  |

---

#### D. COCH3 (T1)

Total energy = -440.767161 a.u

---

| Atomic<br>Number | Coordinates (Angstroms) |           |           |
|------------------|-------------------------|-----------|-----------|
|                  | X                       | Y         | Z         |
| 6                | 1.912263                | 0.270531  | 0.000105  |
| 6                | 0.717179                | 1.108632  | 0.000053  |
| 6                | -0.384255               | 0.257666  | 0.000050  |
| 6                | 0.247753                | -1.084868 | -0.000101 |
| 7                | 1.637552                | -1.008973 | 0.000079  |
| 1                | 0.680005                | 2.186277  | 0.000035  |
| 6                | 3.310941                | 0.779593  | 0.000238  |
| 1                | 3.491047                | 1.407800  | -0.877181 |
| 1                | 3.490858                | 1.407851  | 0.877655  |
| 1                | 4.013882                | -0.051350 | 0.000329  |
| 6                | -0.399035               | -2.416195 | -0.000542 |
| 1                | 0.368738                | -3.188769 | -0.001677 |
| 1                | -1.043042               | -2.555868 | 0.876121  |
| 1                | -1.044447               | -2.554501 | -0.876392 |

|   |           |           |           |
|---|-----------|-----------|-----------|
| 8 | -2.018806 | 1.949761  | -0.000801 |
| 6 | -1.741110 | 0.705837  | -0.000104 |
| 6 | -2.917923 | -0.249708 | 0.000891  |
| 1 | -3.547949 | -0.056752 | -0.875829 |
| 1 | -2.648395 | -1.304282 | 0.002160  |
| 1 | -3.547986 | -0.054616 | 0.877097  |

-----

**E. OH (S<sub>0</sub>)**

**Total energy = -363.425514a.u**

| Atomic<br>Number | Coordinates (Angstroms) |           |           |
|------------------|-------------------------|-----------|-----------|
|                  | X                       | Y         | Z         |
| 6                | 1.357565                | -0.004796 | -0.000033 |
| 6                | 0.604696                | 1.172880  | -0.028481 |
| 6                | -0.736022               | 0.731881  | -0.030096 |
| 6                | -0.710392               | -0.653484 | -0.001779 |
| 7                | 0.574793                | -1.104134 | 0.011808  |
| 1                | 0.964825                | 2.192100  | -0.064630 |
| 6                | 2.852539                | -0.123980 | 0.014298  |
| 1                | 3.319583                | 0.863430  | -0.011348 |
| 1                | 3.209014                | -0.640737 | 0.911355  |
| 1                | 3.220397                | -0.692249 | -0.845867 |
| 6                | -1.882847               | -1.581466 | 0.002571  |
| 1                | -1.864700               | -2.251071 | 0.868548  |
| 1                | -2.812919               | -1.010057 | 0.030623  |
| 1                | -1.904659               | -2.216597 | -0.889294 |
| 8                | -1.889247               | 1.532815  | -0.074260 |
| 1                | -1.954344               | 1.975388  | 0.773148  |

-----

**E. OH (T<sub>1</sub>)**

**Total energy = -363.327103a.u**

| Atomic<br>Number | Coordinates (Angstroms) |           |           |
|------------------|-------------------------|-----------|-----------|
|                  | X                       | Y         | Z         |
| 6                | 1.338237                | 0.009460  | -0.000564 |
| 6                | 0.622334                | -1.160327 | -0.001539 |
| 6                | -0.771199               | -0.772565 | 0.000090  |
| 6                | -0.716760               | 0.688221  | 0.001423  |
| 7                | 0.525539                | 1.138172  | 0.001320  |
| 1                | 1.000283                | -2.171276 | -0.001921 |
| 6                | 2.820776                | 0.186854  | -0.000008 |
| 1                | 3.146961                | 0.749356  | 0.879441  |
| 1                | 3.329991                | -0.777543 | -0.002146 |
| 1                | 3.147177                | 0.753395  | -0.876769 |
| 6                | -1.915321               | 1.574930  | -0.000874 |
| 1                | -1.602546               | 2.616943  | 0.062920  |
| 1                | -2.509632               | 1.437507  | -0.908680 |
| 1                | -2.576826               | 1.344864  | 0.838291  |
| 8                | -1.826436               | -1.467980 | 0.001318  |
| 1                | -1.271096               | -3.336045 | -0.002090 |

-----

**F. NH<sub>2</sub> (S<sub>0</sub>)****Total energy = -343.550644a.u**

---

| Atomic<br>Number | Coordinates (Angstroms) |           |           |
|------------------|-------------------------|-----------|-----------|
|                  | X                       | Y         | Z         |
| 6                | -1.377288               | 0.023098  | 0.000019  |
| 6                | -0.601162               | 1.181224  | 0.000039  |
| 6                | 0.739129                | 0.733929  | 0.000004  |
| 6                | 0.674486                | -0.659539 | -0.000023 |
| 7                | -0.611159               | -1.092931 | 0.000003  |
| 1                | -0.939273               | 2.208538  | 0.000096  |
| 6                | -2.873740               | -0.072689 | -0.000019 |
| 1                | -3.323892               | 0.922830  | 0.000427  |
| 1                | -3.245584               | -0.609047 | -0.879193 |
| 1                | -3.245539               | -0.609830 | 0.878692  |
| 6                | 1.822090                | -1.621926 | -0.000010 |
| 1                | 1.807080                | -2.274480 | 0.879209  |
| 1                | 1.806279                | -2.275328 | -0.878576 |
| 1                | 2.776485                | -1.087673 | -0.000701 |
| 7                | 1.909358                | 1.584108  | 0.000071  |
| 1                | 2.488271                | 1.390578  | 0.809080  |
| 1                | 2.487692                | 1.391592  | -0.809603 |

---

**F. NH<sub>2</sub> (T<sub>1</sub>)****Total energy = -343.437341a.u**

---

| Atomic<br>Number | Coordinates (Angstroms) |           |           |
|------------------|-------------------------|-----------|-----------|
|                  | X                       | Y         | Z         |
| 6                | 1.364069                | -0.025905 | 0.000008  |
| 6                | 0.624816                | -1.183315 | 0.000128  |
| 6                | -0.740230               | -0.764353 | 0.000019  |
| 6                | -0.684181               | 0.685099  | -0.000067 |
| 7                | 0.566629                | 1.109511  | -0.000093 |
| 1                | 0.973531                | -2.203293 | 0.000192  |
| 6                | 2.848115                | 0.120898  | -0.000013 |
| 1                | 3.337475                | -0.853211 | -0.000013 |
| 1                | 3.183012                | 0.679079  | -0.878155 |
| 1                | 3.183003                | 0.679121  | 0.878095  |
| 6                | -1.849945               | 1.615066  | 0.000086  |
| 1                | -1.489885               | 2.645648  | -0.000043 |
| 1                | -2.491504               | 1.440505  | -0.868959 |
| 1                | -2.491134               | 1.440597  | 0.869431  |
| 7                | -1.848548               | -1.516853 | -0.000168 |
| 1                | -1.791764               | -2.562451 | 0.000346  |
| 1                | -2.815167               | -1.099544 | -0.000038 |

---

**G. COOH (S<sub>0</sub>)****Total energy = -476.824988a.u**

---

| Atomic<br>Number | Coordinates (Angstroms) |           |          |
|------------------|-------------------------|-----------|----------|
|                  | X                       | Y         | Z        |
| 6                | 1.883124                | -0.298669 | 0.000129 |
| 6                | 0.792319                | -1.133108 | 0.000034 |

---

|   |           |           |           |
|---|-----------|-----------|-----------|
| 6 | -0.349167 | -0.276444 | -0.000030 |
| 6 | 0.175702  | 1.040544  | 0.000040  |
| 7 | 1.508191  | 1.024565  | 0.000134  |
| 1 | 0.778781  | -2.212558 | 0.000004  |
| 6 | 3.332985  | -0.668021 | 0.000213  |
| 1 | 3.455519  | -1.752482 | 0.000209  |
| 1 | 3.846533  | -0.267070 | -0.878371 |
| 1 | 3.846426  | -0.267089 | 0.878870  |
| 6 | -0.566520 | 2.342269  | 0.000042  |
| 1 | 0.160985  | 3.153690  | -0.000002 |
| 1 | -1.213166 | 2.441264  | -0.874443 |
| 1 | -1.213095 | 2.441303  | 0.874575  |
| 8 | -2.132260 | -1.856026 | -0.000173 |
| 6 | -1.706124 | -0.710663 | -0.000141 |
| 8 | -2.632200 | 0.313929  | -0.000228 |
| 1 | -3.477564 | -0.147690 | -0.000293 |

-----

### G. COOH (T<sub>i</sub>)

**Total energy = -476.709170a.u**

| Atomic<br>Number | Coordinates (Angstroms) |           |           |
|------------------|-------------------------|-----------|-----------|
|                  | X                       | Y         | Z         |
| 6                | 1.911549                | -0.262387 | -0.000002 |
| 6                | 0.732910                | -1.135452 | 0.000004  |
| 6                | -0.384974               | -0.294975 | -0.000022 |
| 6                | 0.214631                | 1.062190  | -0.000058 |
| 7                | 1.611644                | 1.005950  | -0.000032 |
| 1                | 0.731549                | -2.213967 | 0.000055  |
| 6                | 3.318560                | -0.747653 | 0.000016  |
| 1                | 3.509146                | -1.373039 | 0.877734  |
| 1                | 3.509156                | -1.373072 | -0.877676 |
| 1                | 4.006841                | 0.095399  | 0.000004  |
| 6                | -0.492839               | 2.360372  | 0.000043  |
| 1                | 0.232950                | 3.173196  | -0.000084 |
| 1                | -1.151547               | 2.456083  | -0.869888 |
| 1                | -1.151248               | 2.456113  | 0.870204  |
| 8                | -2.193957               | -1.858201 | 0.000023  |
| 6                | -1.731359               | -0.691616 | -0.000013 |
| 8                | -2.665772               | 0.370669  | -0.000013 |
| 1                | -3.501397               | -0.104985 | -0.000019 |

-----

### H. CN (S<sub>0</sub>)

**Total energy = -380.488770a.u**

| Atomic<br>Number | Coordinates (Angstroms) |           |           |
|------------------|-------------------------|-----------|-----------|
|                  | X                       | Y         | Z         |
| 6                | 1.573125                | -0.254321 | 0.000012  |
| 6                | 0.557773                | -1.189984 | 0.000026  |
| 6                | -0.648561               | -0.430689 | 0.000007  |
| 6                | -0.246055               | 0.918656  | -0.000010 |
| 7                | 1.087026                | 1.021933  | -0.000010 |
| 1                | 0.648121                | -2.265694 | 0.000022  |
| 6                | 3.048656                | -0.506232 | -0.000010 |
| 1                | 3.258210                | -1.577301 | 0.000017  |
| 1                | 3.527683                | -0.065976 | -0.878872 |
| 1                | 3.527718                | -0.065924 | 0.878806  |

|   |           |           |           |
|---|-----------|-----------|-----------|
| 6 | -1.138576 | 2.119557  | 0.000006  |
| 1 | -0.958213 | 2.742973  | -0.879141 |
| 1 | -2.187782 | 1.821406  | -0.000586 |
| 1 | -0.959093 | 2.742378  | 0.879764  |
| 6 | -1.976094 | -0.905857 | -0.000004 |
| 7 | -3.069633 | -1.284597 | -0.000014 |

---

#### H. CN (T<sub>1</sub>)

**Total energy = -380.488770a.u**

| Atomic<br>Number | Coordinates (Angstroms) |           |           |
|------------------|-------------------------|-----------|-----------|
|                  | X                       | Y         | Z         |
| 6                | 1.532508                | -0.282483 | 0.046607  |
| 6                | 0.427452                | -1.167492 | -0.184015 |
| 6                | -0.740186               | -0.428099 | 0.077305  |
| 6                | -0.220462               | 0.974474  | 0.365340  |
| 7                | 1.211621                | 0.932586  | 0.408071  |
| 1                | 0.499828                | -2.188272 | -0.528006 |
| 6                | 2.966471                | -0.679647 | -0.122188 |
| 1                | 3.126122                | -1.713497 | 0.189459  |
| 1                | 3.262776                | -0.600442 | -1.171236 |
| 1                | 3.602363                | -0.016989 | 0.463085  |
| 6                | -0.834859               | 2.143990  | -0.320500 |
| 1                | -0.394709               | 3.074904  | 0.040218  |
| 1                | -0.656406               | 2.088167  | -1.408431 |
| 1                | -1.915337               | 2.164599  | -0.170186 |
| 6                | -2.066156               | -0.812846 | 0.049844  |
| 7                | -3.199228               | -1.117706 | 0.036321  |

---

#### I. NO (S<sub>0</sub>)

**Total energy = -947.149283 a.u**

| Atomic<br>Number | Coordinates (Angstroms) |           |           |
|------------------|-------------------------|-----------|-----------|
|                  | X                       | Y         | Z         |
| 6                | -1.181314               | 0.329395  | -0.058448 |
| 6                | -0.745274               | 1.653254  | -0.024893 |
| 6                | 0.648379                | 1.561623  | 0.019743  |
| 6                | 0.954561                | 0.182122  | 0.006568  |
| 6                | 2.267176                | -0.433257 | 0.078667  |
| 6                | 4.399619                | -0.925421 | -0.241837 |
| 6                | 3.906411                | -1.801895 | 0.661621  |
| 1                | 5.383168                | -0.825052 | -0.662781 |
| 1                | 4.376413                | -2.613488 | 1.186021  |
| 7                | 2.584353                | -1.482775 | 0.851763  |
| 7                | 3.370743                | -0.088360 | -0.599666 |
| 6                | 1.683407                | -2.169851 | 1.770785  |
| 1                | 1.028829                | -1.440774 | 2.237537  |
| 1                | 1.080213                | -2.894028 | 1.230689  |
| 1                | 2.287868                | -2.666669 | 2.523670  |
| 6                | 3.489716                | 0.965473  | -1.604526 |
| 1                | 3.844428                | 1.881154  | -1.141751 |
| 1                | 4.181895                | 0.622925  | -2.368533 |
| 1                | 2.513137                | 1.143205  | -2.044346 |
| 6                | -2.539938               | -0.154159 | -0.122461 |
| 6                | -4.310832               | -1.425222 | -0.530169 |
| 6                | -4.742829               | -0.312100 | 0.098932  |

|   |           |           |           |
|---|-----------|-----------|-----------|
| 1 | -4.848276 | -2.280056 | -0.897305 |
| 1 | -5.729654 | -0.004801 | 0.392423  |
| 7 | -3.635399 | 0.464907  | 0.351600  |
| 7 | -2.946275 | -1.313825 | -0.665481 |
| 6 | -3.670379 | 1.739069  | 1.058013  |
| 1 | -2.805552 | 1.811134  | 1.711844  |
| 1 | -3.666635 | 2.566500  | 0.351896  |
| 1 | -4.580373 | 1.771543  | 1.649256  |
| 6 | -2.104858 | -2.299148 | -1.337725 |
| 1 | -1.556647 | -2.885213 | -0.606556 |
| 1 | -2.754302 | -2.937863 | -1.928807 |
| 1 | -1.394932 | -1.787138 | -1.979025 |
| 7 | -0.148054 | -0.565967 | -0.034240 |
| 1 | -1.314063 | 2.566265  | -0.048597 |
| 8 | 1.208687  | 3.688054  | 0.186439  |
| 7 | 1.626334  | 2.558679  | 0.132777  |

-----

**I. NO (T1)**

**Total energy = -947.120960 a.u**

| Atomic<br>Number | Coordinates (Angstroms) |           |           |
|------------------|-------------------------|-----------|-----------|
|                  | X                       | Y         | Z         |
| 6                | 0.960639                | 0.176281  | 0.007023  |
| 6                | 0.659328                | 1.562166  | 0.024623  |
| 6                | -0.732907               | 1.664160  | -0.017969 |
| 6                | -1.179416               | 0.331803  | -0.054275 |
| 6                | -2.539454               | -0.141137 | -0.119723 |
| 6                | -4.746528               | -0.280984 | 0.089323  |
| 6                | -4.318007               | -1.407697 | -0.516344 |
| 1                | -5.733094               | 0.037841  | 0.370997  |
| 1                | -4.858729               | -2.265626 | -0.871130 |
| 7                | -2.951474               | -1.308005 | -0.645451 |
| 7                | -3.635282               | 0.493564  | 0.335346  |
| 6                | -2.114820               | -2.311978 | -1.293767 |
| 1                | -1.398069               | -1.817983 | -1.941596 |
| 1                | -1.573079               | -2.886787 | -0.548699 |
| 1                | -2.766568               | -2.958750 | -1.873602 |
| 6                | -3.666600               | 1.776493  | 1.024666  |
| 1                | -3.645140               | 2.595282  | 0.308700  |
| 1                | -4.584359               | 1.826080  | 1.602636  |
| 1                | -2.810590               | 1.847917  | 1.690004  |
| 6                | 2.255389                | -0.452993 | 0.079420  |
| 6                | 3.873665                | -1.869551 | 0.620406  |
| 6                | 4.398569                | -0.943568 | -0.210835 |
| 1                | 4.323287                | -2.716755 | 1.104785  |
| 1                | 5.394051                | -0.826676 | -0.598003 |
| 7                | 3.383903                | -0.077071 | -0.546242 |
| 7                | 2.547749                | -1.551663 | 0.796017  |
| 6                | 3.520095                | 1.008644  | -1.511564 |
| 1                | 2.556555                | 1.183319  | -1.981374 |
| 1                | 3.850533                | 1.917946  | -1.017073 |
| 1                | 4.244289                | 0.703948  | -2.261714 |
| 6                | 1.622803                | -2.278099 | 1.657496  |
| 1                | 1.007555                | -2.949603 | 1.065327  |
| 1                | 2.208229                | -2.838715 | 2.380130  |
| 1                | 0.979121                | -1.567002 | 2.165764  |

|   |           |           |           |
|---|-----------|-----------|-----------|
| 7 | -0.162988 | -0.560472 | -0.033950 |
| 1 | -1.294758 | 2.580814  | -0.044773 |
| 7 | 1.575702  | 2.575560  | 0.128935  |
| 8 | 1.355120  | 3.766265  | 0.192020  |

-----

**J. NO<sub>2</sub> (S<sub>0</sub>)**

**Total energy = -1022.363328 a.u**

-----

| Atomic<br>Number | Coordinates (Angstroms) |           |           |
|------------------|-------------------------|-----------|-----------|
|                  | X                       | Y         | Z         |
| 6                | 0.848026                | 0.055537  | 0.003782  |
| 6                | 0.565996                | 1.434854  | -0.022695 |
| 6                | -0.813468               | 1.576797  | -0.073324 |
| 6                | -1.290845               | 0.263691  | -0.071537 |
| 6                | -2.662483               | -0.181550 | -0.124150 |
| 6                | -4.869512               | -0.268902 | 0.094460  |
| 6                | -4.467410               | -1.415976 | -0.491633 |
| 1                | -5.848036               | 0.076807  | 0.372610  |
| 1                | -5.027613               | -2.268569 | -0.828731 |
| 7                | -3.099733               | -1.348127 | -0.626224 |
| 7                | -3.740954               | 0.485312  | 0.322933  |
| 6                | -2.284982               | -2.381763 | -1.258041 |
| 1                | -1.563389               | -1.914815 | -1.920453 |
| 1                | -1.750579               | -2.951419 | -0.504195 |
| 1                | -2.951887               | -3.026825 | -1.822084 |
| 6                | -3.741291               | 1.785238  | 0.981501  |
| 1                | -3.702943               | 2.585630  | 0.245790  |
| 1                | -4.656012               | 1.869556  | 1.560128  |
| 1                | -2.882356               | 1.853136  | 1.643608  |
| 6                | 2.126173                | -0.637114 | 0.080686  |
| 6                | 3.694241                | -2.043764 | 0.753338  |
| 6                | 4.158144                | -1.394880 | -0.339167 |
| 1                | 4.148823                | -2.793098 | 1.374953  |
| 1                | 5.097003                | -1.467159 | -0.857034 |
| 7                | 3.170332                | -0.534033 | -0.748110 |
| 7                | 2.432676                | -1.560998 | 1.000580  |
| 6                | 3.270585                | 0.346217  | -1.906023 |
| 1                | 2.274022                | 0.684238  | -2.174343 |
| 1                | 3.887498                | 1.205116  | -1.658502 |
| 1                | 3.701580                | -0.216279 | -2.729813 |
| 6                | 1.568537                | -1.985555 | 2.096213  |
| 1                | 0.885308                | -2.757915 | 1.754020  |
| 1                | 2.197900                | -2.364064 | 2.895974  |

|   |           |           |           |
|---|-----------|-----------|-----------|
| 1 | 0.997268  | -1.131598 | 2.446561  |
| 7 | -0.283507 | -0.652555 | -0.022365 |
| 1 | -1.344973 | 2.510533  | -0.121562 |
| 7 | 1.503039  | 2.512770  | 0.077826  |
| 8 | 1.075964  | 3.641349  | 0.032760  |
| 8 | 2.680929  | 2.217795  | 0.211004  |

-----

**J. NO<sub>2</sub> (T1)**

**Total energy = -1022.259284 a.u**

-----

| Atomic | Coordinates (Angstroms) |   |   |
|--------|-------------------------|---|---|
| Number | X                       | Y | Z |

-----

|   |           |           |           |
|---|-----------|-----------|-----------|
| 6 | 0.842064  | 0.019005  | -0.032608 |
| 6 | 0.592566  | 1.405752  | -0.073506 |
| 6 | -0.781947 | 1.575168  | -0.126236 |
| 6 | -1.290546 | 0.264121  | -0.096751 |
| 6 | -2.671490 | -0.149431 | -0.126970 |
| 6 | -4.879269 | -0.183209 | 0.111097  |
| 6 | -4.506993 | -1.354219 | -0.445832 |
| 1 | -5.847669 | 0.191007  | 0.387645  |
| 1 | -5.088207 | -2.203418 | -0.754650 |
| 7 | -3.139128 | -1.319918 | -0.593304 |
| 7 | -3.732594 | 0.552580  | 0.309747  |
| 6 | -2.352960 | -2.388323 | -1.201295 |
| 1 | -1.624657 | -1.956279 | -1.879856 |
| 1 | -1.826246 | -2.949152 | -0.435235 |
| 1 | -3.038161 | -3.033690 | -1.742754 |
| 6 | -3.699502 | 1.866177  | 0.938859  |
| 1 | -3.652673 | 2.649435  | 0.185344  |
| 1 | -4.606379 | 1.982291  | 1.524391  |
| 1 | -2.832590 | 1.930764  | 1.590761  |
| 6 | 2.106637  | -0.680855 | 0.048729  |
| 6 | 3.658106  | -2.134978 | 0.666284  |
| 6 | 4.182847  | -1.361331 | -0.309763 |
| 1 | 4.084021  | -2.945513 | 1.228550  |
| 1 | 5.155295  | -1.364713 | -0.766921 |
| 7 | 3.205883  | -0.472656 | -0.690052 |
| 7 | 2.372398  | -1.699260 | 0.879788  |
| 6 | 3.354013  | 0.510504  | -1.756225 |
| 1 | 2.366586  | 0.792267  | -2.111203 |
| 1 | 3.873903  | 1.389658  | -1.383237 |

|   |           |           |           |
|---|-----------|-----------|-----------|
| 1 | 3.915808  | 0.056083  | -2.567467 |
| 6 | 1.457359  | -2.242135 | 1.876932  |
| 1 | 0.779838  | -2.954506 | 1.414679  |
| 1 | 2.049062  | -2.726792 | 2.647680  |
| 1 | 0.879625  | -1.428917 | 2.305060  |
| 7 | -0.312763 | -0.668275 | -0.034433 |
| 1 | -1.302418 | 2.514415  | -0.183870 |
| 7 | 1.556939  | 2.426299  | -0.069912 |
| 8 | 1.180213  | 3.668739  | 0.121599  |
| 8 | 2.694086  | 2.262284  | 0.514896  |

-----

**K. CHO (S0)**

**Total energy = -931.175254 a.u**

-----

| Atomic<br>Number | Coordinates (Angstroms) |           |           |
|------------------|-------------------------|-----------|-----------|
|                  | X                       | Y         | Z         |
| 6                | 0.951184                | 0.194460  | 0.050565  |
| 6                | 0.647563                | 1.576085  | 0.049116  |
| 6                | -0.743465               | 1.644414  | -0.018886 |
| 6                | -1.181813               | 0.316431  | -0.046505 |
| 6                | -2.537543               | -0.170269 | -0.121015 |
| 6                | -4.744858               | -0.325572 | 0.066607  |
| 6                | -4.301877               | -1.452902 | -0.527735 |
| 1                | -5.736605               | -0.012054 | 0.335769  |
| 1                | -4.832401               | -2.317043 | -0.882820 |
| 7                | -2.934875               | -1.343388 | -0.642731 |
| 7                | -3.641998               | 0.458542  | 0.319305  |
| 6                | -2.082126               | -2.343477 | -1.276313 |
| 1                | -1.366698               | -1.846899 | -1.923654 |
| 1                | -1.539194               | -2.905619 | -0.522680 |
| 1                | -2.722053               | -3.002213 | -1.855776 |
| 6                | -3.690188               | 1.748629  | 0.994796  |
| 1                | -3.666420               | 2.559729  | 0.270395  |
| 1                | -4.614219               | 1.796925  | 1.562765  |
| 1                | -2.841147               | 1.833866  | 1.667437  |
| 6                | 2.256679                | -0.435891 | 0.095794  |
| 6                | 3.900681                | -1.815877 | 0.645561  |
| 6                | 4.366207                | -0.982689 | -0.311004 |
| 1                | 4.381103                | -2.617635 | 1.175827  |
| 1                | 5.329565                | -0.918167 | -0.782957 |
| 7                | 3.334595                | -0.136981 | -0.648019 |
| 7                | 2.595196                | -1.462407 | 0.889081  |
| 6                | 3.405022                | 0.848268  | -1.723257 |
| 1                | 2.396186                | 1.140338  | -1.998532 |
| 1                | 3.963171                | 1.722846  | -1.398097 |
| 1                | 3.900769                | 0.391932  | -2.575873 |
| 6                | 1.722036                | -2.098519 | 1.869676  |
| 1                | 1.105730                | -2.851102 | 1.385975  |
| 1                | 2.346602                | -2.552402 | 2.633280  |
| 1                | 1.078288                | -1.343660 | 2.309994  |
| 7                | -0.147013               | -0.567687 | -0.003626 |
| 1                | -1.315778               | 2.555698  | -0.049993 |

|   |          |          |          |
|---|----------|----------|----------|
| 8 | 1.236116 | 3.858048 | 0.139279 |
| 1 | 2.618405 | 2.435055 | 0.419303 |
| 6 | 1.563236 | 2.701820 | 0.205490 |

**K. CHO (T<sub>1</sub>)**

**Total energy = -931.059555 a.u**

| Atomic<br>Number | Coordinates (Angstroms) |           |           |
|------------------|-------------------------|-----------|-----------|
|                  | X                       | Y         | Z         |
| 6                | 0.966662                | 0.201650  | 0.038006  |
| 6                | 0.661307                | 1.599212  | 0.040852  |
| 6                | -0.742655               | 1.655950  | -0.033858 |
| 6                | -1.172841               | 0.318874  | -0.051498 |
| 6                | -2.522886               | -0.178573 | -0.124262 |
| 6                | -4.732033               | -0.348772 | 0.051475  |
| 6                | -4.274793               | -1.487855 | -0.507660 |
| 1                | -5.728398               | -0.037253 | 0.305272  |
| 1                | -4.795204               | -2.366324 | -0.841829 |
| 7                | -2.907851               | -1.369909 | -0.616664 |
| 7                | -3.637880               | 0.452429  | 0.289645  |
| 6                | -2.045023               | -2.381913 | -1.215199 |
| 1                | -1.331872               | -1.900413 | -1.876298 |
| 1                | -1.497798               | -2.913369 | -0.442461 |
| 1                | -2.678201               | -3.065681 | -1.772870 |
| 6                | -3.703284               | 1.755526  | 0.936548  |
| 1                | -3.678610               | 2.551657  | 0.195590  |
| 1                | -4.633918               | 1.808688  | 1.493336  |
| 1                | -2.862334               | 1.861657  | 1.616227  |
| 6                | 2.259004                | -0.426559 | 0.091984  |
| 6                | 3.896394                | -1.827819 | 0.629614  |
| 6                | 4.384448                | -0.959637 | -0.281594 |
| 1                | 4.365003                | -2.649207 | 1.139932  |
| 1                | 5.358322                | -0.880318 | -0.728838 |
| 7                | 3.359390                | -0.101481 | -0.614896 |
| 7                | 2.583854                | -1.484192 | 0.856690  |
| 6                | 3.428149                | 0.876412  | -1.693859 |
| 1                | 2.418373                | 1.112333  | -2.015719 |
| 1                | 3.922265                | 1.786027  | -1.360199 |
| 1                | 3.986483                | 0.439428  | -2.517406 |
| 6                | 1.695400                | -2.143313 | 1.804767  |
| 1                | 1.064485                | -2.862854 | 1.290124  |
| 1                | 2.307068                | -2.641374 | 2.551269  |
| 1                | 1.063623                | -1.394947 | 2.273479  |
| 7                | -0.144716               | -0.556914 | -0.002300 |
| 1                | -1.332272               | 2.554988  | -0.081055 |
| 8                | 1.100676                | 3.923581  | 0.222661  |
| 6                | 1.548672                | 2.685296  | 0.175370  |
| 1                | 2.598866                | 2.597909  | 0.438712  |

**L. COCH3 (S<sub>0</sub>)**

**Total energy = -970.491678 a.u**

| Atomic<br>Number | Coordinates (Angstroms) |          |           |
|------------------|-------------------------|----------|-----------|
|                  | X                       | Y        | Z         |
| 6                | 0.817440                | 0.045813 | 0.023772  |
| 6                | 0.580842                | 1.438829 | -0.050107 |
| 6                | -0.807313               | 1.560480 | -0.115544 |

|   |           |           |           |
|---|-----------|-----------|-----------|
| 6 | -1.309492 | 0.256072  | -0.066355 |
| 6 | -2.684790 | -0.172590 | -0.100121 |
| 6 | -4.897206 | -0.212612 | 0.101533  |
| 6 | -4.508341 | -1.402701 | -0.400019 |
| 1 | -5.872481 | 0.166437  | 0.345159  |
| 1 | -5.078719 | -2.267895 | -0.683363 |
| 7 | -3.137991 | -1.365094 | -0.524985 |
| 7 | -3.758643 | 0.538776  | 0.289040  |
| 6 | -2.336135 | -2.450837 | -1.078359 |
| 1 | -1.619988 | -2.044271 | -1.785121 |
| 1 | -1.793675 | -2.958788 | -0.287203 |
| 1 | -3.013085 | -3.136737 | -1.578960 |
| 6 | -3.745976 | 1.879664  | 0.857520  |
| 1 | -3.670345 | 2.627240  | 0.071000  |
| 1 | -4.672811 | 2.021661  | 1.404883  |
| 1 | -2.901396 | 1.975264  | 1.534442  |
| 6 | 2.081616  | -0.671811 | 0.064970  |
| 6 | 3.687467  | -2.049700 | 0.720833  |
| 6 | 4.077246  | -1.487763 | -0.445716 |
| 1 | 4.179845  | -2.759276 | 1.360362  |
| 1 | 4.973629  | -1.614458 | -1.025120 |
| 7 | 3.068416  | -0.641496 | -0.842341 |
| 7 | 2.451354  | -1.530963 | 1.023414  |
| 6 | 3.050965  | 0.083000  | -2.108295 |
| 1 | 2.157720  | 0.698893  | -2.147432 |
| 1 | 3.935195  | 0.711435  | -2.179656 |
| 1 | 3.042514  | -0.631385 | -2.928187 |
| 6 | 1.657551  | -1.863535 | 2.201171  |
| 1 | 0.992943  | -2.693692 | 1.977454  |
| 1 | 2.335344  | -2.127897 | 3.007458  |
| 1 | 1.064332  | -0.997265 | 2.477606  |
| 7 | -0.313735 | -0.669075 | 0.015198  |
| 1 | -1.331748 | 2.497437  | -0.191713 |
| 8 | 1.095346  | 3.708830  | -0.208721 |
| 6 | 1.494061  | 2.595899  | 0.040465  |
| 6 | 2.923830  | 2.375509  | 0.489414  |
| 1 | 2.997243  | 1.613266  | 1.265310  |
| 1 | 3.537375  | 2.063672  | -0.357332 |
| 1 | 3.318950  | 3.318395  | 0.856920  |

**L.COCH3 (T1)**

**Total energy = -970.374484 a.u**

| Atomic<br>Number | Coordinates (Angstroms) |           |           |
|------------------|-------------------------|-----------|-----------|
|                  | X                       | Y         | Z         |
| 6                | 0.834692                | 0.023318  | 0.046263  |
| 6                | 0.622310                | 1.435576  | -0.025529 |
| 6                | -0.774345               | 1.575844  | -0.119449 |
| 6                | -1.293618               | 0.271665  | -0.059683 |
| 6                | -2.673277               | -0.140345 | -0.107217 |
| 6                | -4.889877               | -0.153688 | 0.061932  |
| 6                | -4.506214               | -1.357284 | -0.410151 |
| 1                | -5.864583               | 0.239665  | 0.284137  |
| 1                | -5.081689               | -2.221900 | -0.684810 |

|   |           |           |           |
|---|-----------|-----------|-----------|
| 7 | -3.134059 | -1.336595 | -0.515986 |
| 7 | -3.746340 | 0.589717  | 0.251179  |
| 6 | -2.338149 | -2.443318 | -1.033647 |
| 1 | -1.598156 | -2.059745 | -1.728427 |
| 1 | -1.822781 | -2.946988 | -0.221452 |
| 1 | -3.014806 | -3.126773 | -1.538153 |
| 6 | -3.728981 | 1.937268  | 0.802647  |
| 1 | -3.639773 | 2.674447  | 0.007662  |
| 1 | -4.660556 | 2.093687  | 1.338019  |
| 1 | -2.891197 | 2.034180  | 1.487619  |
| 6 | 2.071542  | -0.711820 | 0.053231  |
| 6 | 3.606000  | -2.246497 | 0.526028  |
| 6 | 4.103238  | -1.457806 | -0.450974 |
| 1 | 4.032333  | -3.093342 | 1.031723  |
| 1 | 5.044745  | -1.485585 | -0.968124 |
| 7 | 3.139647  | -0.518545 | -0.744162 |
| 7 | 2.351589  | -1.771448 | 0.832375  |
| 6 | 3.220465  | 0.443626  | -1.834929 |
| 1 | 2.214025  | 0.665141  | -2.178703 |
| 1 | 3.696138  | 1.363359  | -1.502762 |
| 1 | 3.798635  | -0.001124 | -2.639949 |
| 6 | 1.471049  | -2.317264 | 1.856042  |
| 1 | 0.759714  | -3.007066 | 1.409758  |
| 1 | 2.083120  | -2.828328 | 2.593488  |
| 1 | 0.923936  | -1.501572 | 2.319072  |
| 7 | -0.325620 | -0.663418 | 0.047076  |
| 1 | -1.302732 | 2.509161  | -0.206941 |
| 8 | 1.093524  | 3.719730  | -0.189634 |
| 6 | 1.559218  | 2.500529  | 0.048380  |
| 6 | 2.875340  | 2.517926  | 0.769015  |
| 1 | 3.219361  | 1.500309  | 0.939200  |
| 1 | 3.635493  | 3.064127  | 0.208948  |
| 1 | 2.767697  | 3.006143  | 1.741632  |

-----

### M. OH (S<sub>0</sub>)

Total energy = -893.078811 a.u

| Atomic<br>Number | Coordinates (Angstroms) |           |           |
|------------------|-------------------------|-----------|-----------|
|                  | X                       | Y         | Z         |
| 6                | 1.000091                | 0.383088  | 0.029540  |
| 6                | 0.655199                | 1.749428  | 0.082927  |
| 6                | -0.725711               | 1.810634  | 0.045404  |
| 6                | -1.140236               | 0.456788  | -0.029123 |
| 6                | -2.480624               | -0.058036 | -0.113053 |
| 6                | -4.686378               | -0.278927 | 0.072642  |
| 6                | -4.212233               | -1.383721 | -0.537478 |
| 1                | -5.686221               | 0.002289  | 0.347171  |
| 1                | -4.718568               | -2.257325 | -0.904377 |
| 7                | -2.848246               | -1.234785 | -0.652958 |
| 7                | -3.604836               | 0.532718  | 0.336201  |
| 6                | -1.973366               | -2.203660 | -1.302603 |
| 1                | -1.270390               | -1.680031 | -1.942170 |

|   |           |           |           |
|---|-----------|-----------|-----------|
| 1 | -1.413945 | -2.762925 | -0.558688 |
| 1 | -2.599146 | -2.869861 | -1.889296 |
| 6 | -3.686553 | 1.802657  | 1.041508  |
| 1 | -3.680733 | 2.632665  | 0.337942  |
| 1 | -4.613589 | 1.816293  | 1.606713  |
| 1 | -2.842633 | 1.890652  | 1.720350  |
| 6 | 2.313474  | -0.200383 | 0.086402  |
| 6 | 3.983911  | -1.576926 | 0.577162  |
| 6 | 4.476190  | -0.598491 | -0.211983 |
| 1 | 4.463021  | -2.426446 | 1.027908  |
| 1 | 5.467807  | -0.428247 | -0.588884 |
| 7 | 3.429598  | 0.241843  | -0.517341 |
| 7 | 2.645605  | -1.316240 | 0.759271  |
| 6 | 3.520244  | 1.369662  | -1.436507 |
| 1 | 2.547756  | 1.522872  | -1.895227 |
| 1 | 3.806532  | 2.271229  | -0.903903 |
| 1 | 4.255103  | 1.125828  | -2.198540 |
| 6 | 1.745410  | -2.109613 | 1.585498  |
| 1 | 1.164623  | -2.787132 | 0.965729  |
| 1 | 2.346865  | -2.668527 | 2.296443  |
| 1 | 1.065678  | -1.443450 | 2.107568  |
| 7 | -0.103130 | -0.397989 | -0.034808 |
| 1 | -1.328797 | 2.702768  | 0.038212  |
| 8 | 1.568021  | 2.752579  | 0.186855  |
| 1 | 1.123030  | 3.584899  | 0.363630  |

M.OH (T<sub>1</sub>)

Total energy = -892.975500a.u

| Atomic Number | Coordinates (Angstroms) |   |   |
|---------------|-------------------------|---|---|
|               | X                       | Y | Z |

|   |           |           |           |
|---|-----------|-----------|-----------|
| 6 | 1.019290  | 0.359635  | 0.034097  |
| 6 | 0.610289  | 1.743410  | 0.364814  |
| 6 | -0.745537 | 1.791733  | 0.379357  |
| 6 | -1.174412 | 0.452660  | 0.075988  |
| 6 | -2.468117 | -0.038164 | -0.037696 |
| 6 | -4.698968 | -0.188376 | -0.212695 |
| 6 | -4.192940 | -1.443609 | -0.296558 |
| 1 | -5.717153 | 0.152685  | -0.261105 |
| 1 | -4.699450 | -2.384096 | -0.415479 |
| 7 | -2.833796 | -1.366416 | -0.198677 |
| 7 | -3.656064 | 0.677626  | -0.053002 |
| 6 | -1.969784 | -2.536435 | -0.154025 |
| 1 | -1.253822 | -2.509931 | -0.968977 |
| 1 | -1.429194 | -2.566896 | 0.788864  |
| 1 | -2.607437 | -3.411985 | -0.239344 |
| 6 | -3.796542 | 2.116611  | 0.008487  |
| 1 | -3.172201 | 2.587448  | -0.749096 |
| 1 | -4.835992 | 2.362811  | -0.186565 |
| 1 | -3.526155 | 2.489998  | 0.995455  |
| 6 | 2.324793  | -0.171040 | -0.010534 |
| 6 | 3.992133  | -1.657637 | 0.073539  |
| 6 | 4.523309  | -0.469202 | -0.280142 |
| 1 | 4.460405  | -2.611689 | 0.232103  |
| 1 | 5.537569  | -0.197592 | -0.508238 |
| 7 | 3.499474  | 0.447639  | -0.345471 |
| 7 | 2.639194  | -1.481862 | 0.231101  |
| 6 | 3.657945  | 1.772934  | -0.920236 |
| 1 | 2.760528  | 2.030359  | -1.477663 |
| 1 | 3.826883  | 2.519508  | -0.150062 |
| 1 | 4.503993  | 1.745205  | -1.601815 |

|   |           |           |           |
|---|-----------|-----------|-----------|
| 6 | 1.732775  | -2.508646 | 0.713927  |
| 1 | 1.040279  | -2.802998 | -0.069662 |
| 1 | 2.332215  | -3.358967 | 1.026294  |
| 1 | 1.163199  | -2.130071 | 1.559884  |
| 7 | -0.073679 | -0.402699 | -0.118132 |
| 1 | -1.340490 | 2.647604  | 0.640097  |
| 8 | 1.498558  | 2.685020  | 0.674135  |
| 1 | 1.057041  | 3.495190  | 0.951548  |

N. NH<sub>2</sub> (S<sub>0</sub>)

Total energy = -873.206453a.u

| Atomic<br>Number | Coordinates (Angstroms) |           |           |
|------------------|-------------------------|-----------|-----------|
|                  | X                       | Y         | Z         |
| 6                | 0.992097                | 0.402861  | 0.084165  |
| 6                | 0.646854                | 1.773169  | 0.132690  |
| 6                | -0.737559               | 1.806355  | 0.067057  |
| 6                | -1.143657               | 0.451637  | -0.005768 |
| 6                | -2.477109               | -0.076447 | -0.112244 |
| 6                | -4.686211               | -0.309780 | 0.017998  |
| 6                | -4.187337               | -1.427689 | -0.546451 |
| 1                | -5.695344               | -0.028653 | 0.256099  |
| 1                | -4.676922               | -2.315399 | -0.901983 |
| 7                | -2.821715               | -1.271376 | -0.627898 |
| 7                | -3.618257               | 0.517541  | 0.288236  |
| 6                | -1.922920               | -2.251655 | -1.225266 |
| 1                | -1.213899               | -1.742782 | -1.870049 |
| 1                | -1.370911               | -2.776216 | -0.451238 |
| 1                | -2.529416               | -2.946359 | -1.799031 |
| 6                | -3.729693               | 1.806448  | 0.953476  |
| 1                | -3.697019               | 2.616318  | 0.227667  |
| 1                | -4.678400               | 1.833165  | 1.481010  |
| 1                | -2.913163               | 1.916115  | 1.662126  |
| 6                | 2.309083                | -0.181649 | 0.101428  |
| 6                | 3.997508                | -1.552520 | 0.547761  |
| 6                | 4.442124                | -0.623002 | -0.325198 |
| 1                | 4.499290                | -2.383614 | 1.008255  |
| 1                | 5.406104                | -0.486916 | -0.779887 |
| 7                | 3.384689                | 0.213791  | -0.601833 |
| 7                | 2.677980                | -1.264362 | 0.808019  |
| 6                | 3.410437                | 1.274432  | -1.602522 |
| 1                | 2.400483                | 1.424058  | -1.972205 |
| 1                | 3.759388                | 2.204515  | -1.164484 |
| 1                | 4.064981                | 0.959605  | -2.410561 |
| 6                | 1.820584                | -2.009331 | 1.720001  |
| 1                | 1.234257                | -2.740747 | 1.170266  |
| 1                | 2.452870                | -2.503853 | 2.451749  |
| 1                | 1.143462                | -1.317226 | 2.210877  |
| 7                | -0.097620               | -0.394808 | 0.022227  |
| 1                | -1.349148               | 2.692662  | 0.058583  |
| 7                | 1.554384                | 2.847275  | 0.217853  |
| 1                | 1.089510                | 3.742605  | 0.172694  |
| 1                | 2.112441                | 2.819312  | 1.061125  |

N. NH<sub>2</sub> (T<sub>1</sub>)

Total energy = -873.111020a.u

| Atomic<br>Number | Coordinates (Angstroms) |   |   |
|------------------|-------------------------|---|---|
|                  | X                       | Y | Z |

|   |           |           |           |
|---|-----------|-----------|-----------|
| 6 | 1.005485  | 0.317156  | 0.084063  |
| 6 | 0.620016  | 1.681691  | 0.507512  |
| 6 | -0.764327 | 1.737817  | 0.474793  |
| 6 | -1.191706 | 0.450173  | 0.107719  |
| 6 | -2.497257 | -0.040823 | -0.036136 |
| 6 | -4.719938 | -0.170356 | -0.275732 |
| 6 | -4.229965 | -1.428065 | -0.303903 |
| 1 | -5.728809 | 0.188629  | -0.364755 |
| 1 | -4.737465 | -2.369260 | -0.409214 |
| 7 | -2.866437 | -1.356573 | -0.162823 |
| 7 | -3.659632 | 0.686192  | -0.113071 |
| 6 | -2.011936 | -2.530263 | -0.052091 |
| 1 | -1.298668 | -2.559199 | -0.869448 |
| 1 | -1.467852 | -2.508357 | 0.888830  |
| 1 | -2.657157 | -3.403746 | -0.081354 |
| 6 | -3.769429 | 2.129422  | -0.113882 |
| 1 | -3.047634 | 2.554395  | -0.809487 |
| 1 | -4.772573 | 2.393232  | -0.435259 |
| 1 | -3.600391 | 2.533906  | 0.883506  |
| 6 | 2.319051  | -0.174861 | -0.021890 |
| 6 | 4.073469  | -1.561041 | 0.029396  |
| 6 | 4.537660  | -0.346431 | -0.312942 |
| 1 | 4.597307  | -2.487448 | 0.180840  |
| 1 | 5.535060  | -0.023328 | -0.549056 |
| 7 | 3.459494  | 0.529517  | -0.362560 |
| 7 | 2.708226  | -1.471163 | 0.193781  |
| 6 | 3.485472  | 1.717870  | -1.208154 |
| 1 | 2.470711  | 1.968518  | -1.503853 |
| 1 | 3.926512  | 2.567874  | -0.689184 |
| 1 | 4.070154  | 1.509098  | -2.102693 |
| 6 | 1.854345  | -2.524938 | 0.703166  |
| 1 | 1.112793  | -2.805910 | -0.040473 |
| 1 | 2.479882  | -3.378156 | 0.949187  |
| 1 | 1.336547  | -2.181729 | 1.598704  |
| 7 | -0.086181 | -0.416035 | -0.125521 |
| 1 | -1.356505 | 2.577517  | 0.790417  |
| 7 | 1.484244  | 2.607938  | 0.941827  |
| 1 | 1.153586  | 3.468034  | 1.345829  |
| 1 | 2.440855  | 2.352707  | 1.124519  |

**O. COOH (S<sub>0</sub>)**

**Total energy = -1006.446431a.u**

| Atomic<br>Number | Coordinates (Angstroms) |           |           |
|------------------|-------------------------|-----------|-----------|
|                  | X                       | Y         | Z         |
| 6                | 0.827336                | 0.045530  | 0.007712  |
| 6                | 0.585427                | 1.437331  | -0.036376 |
| 6                | -0.800220               | 1.570624  | -0.091114 |
| 6                | -1.302505               | 0.265730  | -0.071865 |
| 6                | -2.677896               | -0.161532 | -0.119316 |
| 6                | -4.889563               | -0.209988 | 0.083793  |
| 6                | -4.500073               | -1.382855 | -0.456752 |
| 1                | -5.864915               | 0.159854  | 0.340960  |
| 1                | -5.070017               | -2.238932 | -0.767424 |
| 7                | -3.130034               | -1.339779 | -0.582339 |
| 7                | -3.751461               | 0.535915  | 0.294330  |
| 6                | -2.327072               | -2.406276 | -1.171256 |
| 1                | -1.602671               | -1.974848 | -1.854407 |
| 1                | -1.794402               | -2.947810 | -0.395750 |

|   |           |           |           |
|---|-----------|-----------|-----------|
| 1 | -3.001753 | -3.068962 | -1.705021 |
| 6 | -3.737892 | 1.857167  | 0.907064  |
| 1 | -3.671290 | 2.630854  | 0.145286  |
| 1 | -4.660321 | 1.978321  | 1.466738  |
| 1 | -2.887995 | 1.932442  | 1.580005  |
| 6 | 2.090986  | -0.671911 | 0.075029  |
| 6 | 3.646990  | -2.102137 | 0.733623  |
| 6 | 4.104793  | -1.471778 | -0.371568 |
| 1 | 4.097509  | -2.855524 | 1.353351  |
| 1 | 5.031910  | -1.569059 | -0.906222 |
| 7 | 3.124939  | -0.595541 | -0.771540 |
| 7 | 2.398622  | -1.593156 | 0.997694  |
| 6 | 3.206812  | 0.246191  | -1.958043 |
| 1 | 2.225524  | 0.667265  | -2.154182 |
| 1 | 3.916131  | 1.050499  | -1.787773 |
| 1 | 3.521415  | -0.366661 | -2.798772 |
| 6 | 1.542522  | -1.991373 | 2.108979  |
| 1 | 0.846771  | -2.760714 | 1.785582  |
| 1 | 2.175753  | -2.364587 | 2.908343  |
| 1 | 0.983005  | -1.125531 | 2.449084  |
| 7 | -0.306909 | -0.661268 | -0.009332 |
| 1 | -1.324705 | 2.508942  | -0.147226 |
| 8 | 1.182727  | 3.725092  | 0.020818  |
| 6 | 1.502518  | 2.570881  | 0.073500  |
| 8 | 2.791897  | 2.192606  | 0.270283  |
| 1 | 3.303988  | 3.006031  | 0.376479  |

#### O. COOH (T<sub>1</sub>)

Total energy = -1006.327123a.u

| Atomic<br>Number | Coordinates (Angstroms) |           |           |
|------------------|-------------------------|-----------|-----------|
|                  | X                       | Y         | Z         |
| 6                | -0.867624               | -0.040721 | -0.003797 |
| 6                | -0.609894               | 1.410883  | -0.172900 |
| 6                | 0.730292                | 1.560019  | -0.115653 |
| 6                | 1.293155                | 0.226993  | 0.020334  |
| 6                | 2.668485                | -0.102779 | 0.064239  |
| 6                | 4.884988                | 0.005873  | 0.278406  |
| 6                | 4.557232                | -1.283744 | 0.032972  |
| 1                | 5.842333                | 0.465069  | 0.444072  |
| 1                | 5.178865                | -2.154829 | -0.064455 |
| 7                | 3.195407                | -1.350751 | -0.093772 |
| 7                | 3.722968                | 0.730830  | 0.302319  |
| 6                | 2.471394                | -2.576906 | -0.404650 |
| 1                | 1.835896                | -2.854970 | 0.430772  |
| 1                | 1.851603                | -2.427276 | -1.283805 |
| 1                | 3.209675                | -3.350345 | -0.594941 |
| 6                | 3.661667                | 2.150795  | 0.604451  |
| 1                | 2.891745                | 2.335831  | 1.350533  |
| 1                | 4.625487                | 2.450306  | 1.004363  |
| 1                | 3.454266                | 2.729179  | -0.293973 |
| 6                | -2.075463               | -0.691289 | 0.158347  |
| 6                | -3.616655               | -2.314088 | 0.126053  |
| 6                | -4.225087               | -1.175415 | 0.552364  |
| 1                | -4.029800               | -3.291618 | -0.046974 |
| 1                | -5.240891               | -1.013671 | 0.866300  |
| 7                | -3.295985               | -0.177511 | 0.585171  |
| 7                | -2.299311               | -2.043918 | -0.084857 |
| 6                | -3.492804               | 1.039327  | 1.360843  |
| 1                | -2.539476               | 1.533139  | 1.515085  |
| 1                | -4.168887               | 1.713309  | 0.842204  |

|   |           |           |           |
|---|-----------|-----------|-----------|
| 1 | -3.904020 | 0.777932  | 2.334540  |
| 6 | -1.370458 | -2.957496 | -0.725186 |
| 1 | -0.516261 | -3.136981 | -0.080176 |
| 1 | -1.899145 | -3.885987 | -0.920914 |
| 1 | -1.019313 | -2.532264 | -1.664422 |
| 7 | 0.334974  | -0.726481 | 0.051757  |
| 1 | 1.242145  | 2.493615  | -0.272763 |
| 8 | -1.204591 | 3.667836  | -0.555688 |
| 6 | -1.480126 | 2.502573  | -0.633373 |
| 8 | -2.609703 | 2.053737  | -1.217730 |
| 1 | -3.080865 | 2.827641  | -1.557128 |

-----

**P. CN (S<sub>0</sub>)**

**Total energy = -910.100291a.u**

| Atomic<br>Number | Coordinates (Angstroms) |           |           |
|------------------|-------------------------|-----------|-----------|
|                  | X                       | Y         | Z         |
| 6                | 0.924529                | 0.217275  | 0.008028  |
| 6                | 0.652457                | 1.605084  | 0.024017  |
| 6                | -0.735701               | 1.718863  | -0.016665 |
| 6                | -1.207587               | 0.399674  | -0.052303 |
| 6                | -2.576447               | -0.051068 | -0.118512 |
| 6                | -4.782569               | -0.164191 | 0.103814  |
| 6                | -4.374519               | -1.282026 | -0.532258 |
| 1                | -5.762468               | 0.161982  | 0.400122  |
| 1                | -4.929982               | -2.123366 | -0.903723 |
| 7                | -3.007811               | -1.198282 | -0.668681 |
| 7                | -3.658416               | 0.587798  | 0.360610  |
| 6                | -2.187296               | -2.196981 | -1.346543 |
| 1                | -1.465807               | -1.695874 | -1.983624 |
| 1                | -1.652512               | -2.799633 | -0.618835 |
| 1                | -2.849540               | -2.817864 | -1.942388 |
| 6                | -3.665120               | 1.855793  | 1.078070  |
| 1                | -3.650643               | 2.689616  | 0.379473  |
| 1                | -4.570569               | 1.900822  | 1.675478  |
| 1                | -2.795534               | 1.904887  | 1.727813  |
| 6                | 2.221115                | -0.428100 | 0.076602  |
| 6                | 3.834299                | -1.826716 | 0.663005  |
| 6                | 4.344715                | -0.963513 | -0.243103 |
| 1                | 4.288626                | -2.645411 | 1.190224  |
| 1                | 5.329920                | -0.883508 | -0.664646 |
| 7                | 3.331711                | -0.107626 | -0.604455 |
| 7                | 2.518902                | -1.480356 | 0.853903  |
| 6                | 3.466050                | 0.924699  | -1.630380 |
| 1                | 2.480796                | 1.161505  | -2.020814 |
| 1                | 3.908892                | 1.821343  | -1.205600 |
| 1                | 4.090284                | 0.528793  | -2.426481 |
| 6                | 1.605500                | -2.141164 | 1.779618  |
| 1                | 0.978261                | -2.848417 | 1.244495  |
| 1                | 2.200662                | -2.654014 | 2.529089  |
| 1                | 0.975051                | -1.393218 | 2.250034  |
| 7                | -0.198165               | -0.507076 | -0.033097 |
| 1                | -1.293045               | 2.639076  | -0.038913 |
| 6                | 1.612049                | 2.644581  | 0.132303  |
| 7                | 2.432173                | 3.445543  | 0.213742  |

-----

**P. CN (T<sub>1</sub>)**

**Total energy = -909.981673a.u**

| Atomic | Coordinates (Angstroms) |  |  |
|--------|-------------------------|--|--|
|--------|-------------------------|--|--|

| Number | X         | Y         | Z         |
|--------|-----------|-----------|-----------|
| 6      | 0.978062  | 0.189027  | -0.000335 |
| 6      | 0.648947  | 1.622939  | 0.240517  |
| 6      | -0.699610 | 1.708637  | 0.243735  |
| 6      | -1.199353 | 0.365188  | 0.018882  |
| 6      | -2.554796 | -0.031732 | -0.040317 |
| 6      | -4.779326 | -0.025826 | -0.203313 |
| 6      | -4.376734 | -1.313775 | -0.104699 |
| 1      | -5.763874 | 0.393492  | -0.301951 |
| 1      | -4.948510 | -2.223531 | -0.091842 |
| 7      | -3.010968 | -1.318004 | -0.009325 |
| 7      | -3.659732 | 0.762044  | -0.167841 |
| 6      | -2.219038 | -2.530091 | 0.155061  |
| 1      | -1.580024 | -2.677634 | -0.710277 |
| 1      | -1.598718 | -2.448669 | 1.042958  |
| 1      | -2.912985 | -3.358870 | 0.259997  |
| 6      | -3.685381 | 2.207045  | -0.312766 |
| 1      | -2.969363 | 2.515307  | -1.071905 |
| 1      | -4.683415 | 2.494691  | -0.628349 |
| 1      | -3.459596 | 2.694251  | 0.634215  |
| 6      | 2.215020  | -0.416465 | -0.078025 |
| 6      | 3.783168  | -2.016018 | 0.006741  |
| 6      | 4.406041  | -0.839254 | -0.276615 |
| 1      | 4.200686  | -2.996408 | 0.150867  |
| 1      | 5.445494  | -0.640851 | -0.467877 |
| 7      | 3.467141  | 0.143455  | -0.340930 |
| 7      | 2.448167  | -1.783506 | 0.100410  |
| 6      | 3.740831  | 1.443521  | -0.942599 |
| 1      | 2.858057  | 1.787126  | -1.475186 |
| 1      | 4.014618  | 2.175743  | -0.188987 |
| 1      | 4.551864  | 1.322282  | -1.656325 |
| 6      | 1.487633  | -2.770644 | 0.559966  |
| 1      | 0.715712  | -2.919792 | -0.187951 |
| 1      | 2.027111  | -3.696924 | 0.736211  |
| 1      | 1.022666  | -2.436885 | 1.486200  |
| 7      | -0.191532 | -0.529970 | -0.109628 |
| 1      | -1.257194 | 2.602867  | 0.457328  |
| 6      | 1.512011  | 2.684580  | 0.608486  |
| 7      | 2.203013  | 3.547553  | 0.922225  |

## 10. References:

1. G. W. T. M. J. Frisch, H. B. Schlegel, G. E. Scuseria,, J. R. C. M. A. Robb, G. Scalmani, V. Barone,, H. N. G. A. Petersson, X. Li, M. Caricato,, J. B. A. V. Marenich, B. G. Janesko, R. Gomperts,, H. P. H. B. Mennucci, J. V. Ortiz, A. F. Izmaylov,, D. W.-Y. J. L. Sonnenberg, F. Ding, F. Lipparini,, J. G. F. Egidi, B. Peng, A. Petrone, T. Henderson,, V. G. Z. D. Ranasinghe, J. Gao, N. Rega, G. Zheng,, M. H. W. Liang, M. Ehara, K. Toyota, R. Fukuda,, M. I. J. Hasegawa, T. Nakajima, Y. Honda, O. Kitao,, T. V. H. Nakai, K. Throssell, J. A. Montgomery Jr.,, F. O. J. E. Peralta, M. J. Bearpark, J. J. Heyd,, K. N. K. E. N. Brothers, V. N. Staroverov, T. A. Keith,, J. N. R. Kobayashi, K. Raghavachari, A. P. Rendell,, S. S. I. J. C. Burant, J. Tomasi, M. Cossi,, M. K. J. M. Millam, C. Adamo, R. Cammi,, R. L. M. J. W. Ochterski, K. Morokuma, O. Farkas, and J. B. F. a. D. J. Fox, Gaussian 16, Revision Revision A.03, *Gaussian Inc. Wallingford CT*, 2016, **1**, 572.
